# Supplementary material
Source: publisher figshare collection journal article supplement (https://geolsoc.figshare.com/ndownloader/files/18530450)
Supplement: Supplementary file 1 [file 18530450]

## Sheet: Feuil1
Diggi	DIG-1A-T4		J = 0.00316140 ± 0.00000790
Incremental Heating		36Ar(a) [V]	37Ar(ca) [V]	38Ar(cl) [V]	39Ar(k) [V]	40Ar(r) [V]	Age	± 2σ	40Ar(r)	39Ar(k)	K/Ca	± 2σ
							(Ma)		(%)	(%)
4_DIG1AT4-A5-35	3.5	0.509857	-0.0101638	0.0366504	2.0887	5.2657	14.3552	12.3115	3.37656	0.167689	-88.3663	1702.25
5_DIG1AT4-A5-45	4.5	14.7361	0.723901	0.149575	25.6282	93.9417	20.8348	14.66	2.11166	2.05754	15.2233	4.42041
7_DIG1AT4-A5-55	5.5	8.1484	0.591481	0.069219	25.0949	61.3048	13.9121	8.35922	2.48258	2.01472	18.2437	5.81996
8_DIG1AT4-A5-65	6.5	6.36638	0.666873	0.0396564	37.5249	99.847	15.1478	4.53109	5.03902	3.01265	24.1961	7.57555
10_DIG1AT4-A5-70	7	2.52856	0.523871	0.0671141	36.149	75.2572	11.8626	1.87082	9.14651	2.90219	29.6716	9.92051
11_DIG1AT4-A5-80	8	1.28542	0.70106	0.0239523	55.0029	111.929	11.5962	0.698369	22.7358	4.41586	33.7364	9.32551
13_DIG1AT4-A5-90	9	1.5205	1.51904	0.0260993	135.717	299.297	12.5636	0.328038	39.9105	10.8959	38.4178	4.49998
14_DIG1AT4-A5-95	9.5	3.34909	3.23891	0	349.878	779.486	12.6917	0.262215	43.9758	28.0896	46.45	2.56183
17_DIG1AT4-A5-100	10	1.70695	1.92157	0	216.885	469.2	12.3254	0.235585	48.0882	17.4124	48.5335	4.8913
18_DIG1AT4-A5-110	11	0.79818	1.26258	0	152.563	319.873	11.9467	0.197578	57.4058	12.2484	51.9587	10.7443
20_DIG1AT4-A5-120	12	0.343518	0.322563	0	40.8518	87.5308	12.2078	0.527665	46.2059	3.27975	54.4584	33.1311
21_DIG1AT4-A5-130	13	0.690216	0.853907	0	111.233	219.173	11.2295	0.244234	51.6661	8.93022	56.0132	13.5941
23_DIG1AT4-A5-135	13.5	0.597563	0.556569	0	50.213	98.8718	11.2218	0.499993	35.8311	4.0313	38.794	12.018
24_DIG1AT4-A5-140	14	0.0769495	0.195303	0	6.74879	13.5796	11.4667	2.88929	37.3234	0.54182	14.8589	13.788
		42.6577	13.0675	0.412266	1245.58	2734.56
Diggi	DIG-1A-T5		J = 0.00320260 ± 0.00000608
Incremental Heating		36Ar(a) [V]	37Ar(ca) [V]	38Ar(cl) [V]	39Ar(k) [V]	40Ar(r) [V]	Age	± 2σ	40Ar(r)	39Ar(k)	K/Ca	± 2σ
							(Ma)		(%)	(%)
5_DIG-1A-T5 A1 35	3.5	48.2609	1.39811	0.622575	5.59014	115.951	116.302	477.08	0.806498	1.45924	1.7193	2.79162
6_DIG-1A-T5 A1 40	4	39.0935	0.676914	0.524525	6.86988	257.845	205.261	359.092	2.18327	1.79331	4.36399	18.0289
9_DIG-1A-T5 A1 45	4.5	13.5196	2.85324	0.171152	9.56358	29.9546	18.0489	31.6818	0.744198	2.49646	1.44129	2.81045
11_DIG-1A-T5 A1 50	5	3.66568	1.57967	0.0913451	21.0646	62.4449	17.0871	4.23796	5.44963	5.49868	5.73397	20.5678
12_DIG-1A-T5 A1 55	5.5	0.837685	2.64022	0.0595622	28.3196	53.3071	10.8685	0.956684	17.7031	7.3925	4.61227	9.94453
14_DIG-1A-T5 A1 60	6	0.499261	0.985949	0	48.0518	94.0284	11.2972	0.444917	38.8506	12.5434	20.9567	122.36
15_DIG-1A-T5 A1 65	6.5	0.496711	2.32237	0	120.326	242.298	11.6244	0.177562	62.0891	31.4097	22.279	53.1825
17_DIG-1A-T5 A1 70	7	0.223003	1.25125	0.0196869	76.3227	155.849	11.7872	0.248112	70.0489	19.9232	26.2287	117.834
18_DIG-1A-T5 A1 75	7.5	0.125019	-0.246194	0	34.0868	64.7926	10.9748	0.532564	63.481	8.89798	-59.5356	1420.74
20_DIG-1A-T5 A1 80	8	0.0765072	2.15184	0.00173878	16.1813	35.3465	12.6066	1.10704	60.8257	4.22394	3.23348	8.26063
21_DIG-1A-T5 A1 90	9	0.0291078	2.18313	0.0302895	5.98605	30.1123	28.9005	3.04537	77.6658	1.56259	1.17904	3.08382
23_DIG-1A-T5 A1 100	10	0.0151258	-0.187305	0	3.92118	17.2422	25.2879	4.59086	79.275	1.02358	-9.00194	277.164
24_DIG-1A-T5 A1 110	11	0.0141952	-2.90532	0.00204302	2.62006	13.2915	29.1431	6.89175	75.9013	0.683938	-0.387781	0.733112
26_DIG-1A-T5 A1 120	12	0.00570739	3.49839	0	1.76206	11.0285	35.8885	10.3616	86.6196	0.459966	0.216581	0.361386
27_DIG-1A-T5 A1 130	13	0.00753641	-0.758693	0	1.31747	8.23704	35.8506	13.8733	78.6216	0.34391	-0.746693	5.53214
29_DIG-1A-T5 A1 140	14	0.0035589	1.49266	0	1.10213	7.87742	40.9267	16.7537	88.1167	0.287698	0.317496	1.19476
		106.873	18.9362	1.52292	383.085	1199.61
Diggi	DIG-1A-T6		J = 0.00320260 ± 0.00000608
Incremental Heating		36Ar(a) [V]	37Ar(ca) [V]	38Ar(cl) [V]	39Ar(k) [V]	40Ar(r) [V]	Age	± 2σ	40Ar(r)	39Ar(k)	K/Ca	± 2σ
							(Ma)		(%)	(%)
31_DIG-1A-T6 A2 35	3.5	6.22837	0.835343	0.198737	14.5049	55.7457	22.1215	78.6497	2.9396	0.94766	7.46653	25.2378
5_DIG-1A-T6 A2 41	4.1	37.1715	-14.6775	0.349364	40.8049	307.838	43.1711	22.1462	2.72606	2.66593	-1.19545	0.178353
7_DIG-1A-T6 A2 43	4.3	14.1268	1.04912	0.133564	36.4282	145.344	22.9603	9.95715	3.36433	2.37999	14.9307	32.7396
8_DIG-1A-T6 A2 45	4.5	4.46369	4.68598	0.0239618	37.5922	93.674	14.3738	3.79966	6.62916	2.45604	3.44958	1.9755
10_DIG-1A-T6 A2 50	5	2.662	-2.85628	0.0796214	43.9566	96.6284	12.6863	1.60486	10.9348	2.87185	-6.61746	7.74436
11_DIG-1A-T6 A2 55	5.5	1.24236	3.89147	0.0456576	51.1679	100.288	11.3154	0.81071	21.4335	3.34298	5.65396	4.50485
13_DIG-1A-T6 A2 60	6	1.07526	2.77107	0.0432505	105.723	213.558	11.6606	0.358161	40.1182	6.9073	16.4056	18.7621
14_DIG-1A-T6 A2 65	6.5	1.45392	-0.0443814	0	274.593	607.629	12.77	0.163233	58.4301	17.9402	-2660.46	189336
16_DIG-1A-T6 A2 70	7	1.66095	2.17941	0	519.765	1118.12	12.4155	0.0972756	69.2776	33.9582	102.55	155.549
17_DIG-1A-T6 A2 75	7.5	0.651645	1.54221	0	188.822	399.538	12.2128	0.165195	67.2703	12.3364	52.6473	108.73
2_DIG-1A-T6 A2 80	8	0.546581	1.61862	0.0129493	122.901	253.525	11.9073	0.230106	60.9098	8.02959	32.6498	65.1597
3_DIG-1A-T6 A2 90	9	0.32404	1.05449	0	55.9682	111.317	11.482	0.462214	53.6175	3.65661	22.8226	60.0325
5_DIG-1A-T6 A2 100	10	0.0432808	1.32628	0.0287363	18.428	37.0277	11.5993	1.30983	74.0617	1.20397	5.97462	16.4996
6_DIG-1A-T6 A2 110	11	0.0184506	1.22528	0	9.24481	18.185	11.3561	2.60023	76.6435	0.603997	3.24437	8.20778
8_DIG-1A-T6 A2 120	12	0.00681185	-1.26692	0.0222638	3.09594	6.35767	11.8538	7.76771	75.6814	0.202269	-1.05078	2.91333
9_DIG-1A-T6 A2 130	13	0.00524896	1.04005	0	2.63351	5.98463	13.1131	9.13042	79.1491	0.172057	1.0888	3.62363
11_DIG-1A-T6 A2 140	14	0.00786309	-0.859617	0.0139199	2.90886	6.52486	12.9441	8.25231	73.5064	0.190046	-1.45508	5.29831
12_DIG-1A-T6 A2 150	15	0.0101255	-3.74661	0	2.06575	4.51361	12.6098	11.6455	59.976	0.134963	-0.237087	0.248765
		71.6989	-0.231937	0.952026	1530.6	3581.79
Diggi	DIG-1B-T2		J = 0.00327710 ± 0.00000590
Incremental Heating		36Ar(a) [V]	37Ar(ca) [V]	38Ar(cl) [V]	39Ar(k) [V]	40Ar(r) [V]	Age	± 2σ	40Ar(r)	39Ar(k)	K/Ca	± 2σ
							(Ma)		(%)	(%)
14_DIG1BT2-40	4	2.36518	212.334	0.273619	25.2984	70.7234	16.4913	3.16524	9.18631	3.41097	0.051232	0.0172567
15_DIG1BT2-43	4.3	1.61888	316.657	0.235742	29.2817	82.8712	16.6942	2.38728	14.758	3.94804	0.0397626	0.0101377
17_DIG1BT2-45	4.5	0.567156	210.582	0.151272	19.0062	52.0093	16.144	2.81601	23.6634	2.5626	0.0388099	0.0137103
18_DIG1BT2-50	5	0.454014	244.556	0.231958	47.2592	111.1	13.878	1.12255	45.2142	6.37193	0.0830952	0.0248194
20_DIG1BT2-55	5.5	0.665393	134.032	0.0666849	181.592	416.917	13.5546	0.305367	67.7583	24.484	0.582581	0.338434
21_DIG1BT2-57	5.7	0.679696	204.054	0.145196	228.018	511.765	13.2518	0.242671	71.5931	30.7435	0.480499	0.166034
23_DIG1BT2-60	6	0.484061	38.8656	0.00677496	120.564	264.734	12.9658	0.430831	64.7363	16.2556	1.33389	2.56793
24_DIG1BT2-63	6.3	0.337448	69.7591	0.0674265	54.7626	120.054	12.945	0.936793	54.4956	7.38362	0.337561	0.364884
26_DIG1BT2-65	6.5	0.111065	-65.3049	0.0715385	15.9434	29.3257	10.8674	3.30837	47.0719	2.14964	-0.104979	0.130925
27_DIG1BT2-70	7	0.0530737	-71.4889	0	8.04875	11.1265	8.1736	6.22626	41.3813	1.08521	-0.0484125	0.0500902
29_DIG1BT2-75	7.5	0.0454729	-52.589	0.0611439	9.34516	15.2731	9.6593	5.18558	53.03	1.26	-0.0764117	0.102217
30_DIG1BT2-80	8	0.012508	-9.63152	0.0154701	2.55741	4.97319	11.4873	19.2738	57.202	0.344814	-0.114176	0.866067
		7.39394	1231.83	1.32683	741.677	1690.87
Diggi	DIG-1B-T3		J = 0.00327710 ± 0.00000590
Incremental Heating		36Ar(a) [V]	37Ar(ca) [V]	38Ar(cl) [V]	39Ar(k) [V]	40Ar(r) [V]	Age	± 2σ	40Ar(r)	39Ar(k)	K/Ca	± 2σ
							(Ma)		(%)	(%)
17_DIG-1B-T3 35	3.5	1.74604	180.224	0.231795	16.7069	38.9336	13.7575	2.77225	7.01444	7.43239	0.0398614	0.00706353
18_DIG-1B-T3 37	3.7	1.60339	182.086	0.0988428	15.562	48.6546	18.4335	2.90567	9.30996	6.92301	0.0367499	0.00836804
19_DIG-1B-T3 40	4	0.834648	56.5108	0.0796428	19.6866	45.8332	13.7443	1.44275	15.6608	8.75796	0.149799	0.0957222
21_DIG-1B-T3 43	4.3	0.361868	8.59277	0	10.8712	22.4212	12.181	2.27114	17.3192	4.83623	0.544015	2.78827
22_DIG-1B-T3 45	4.5	0.212477	20.22	0	7.72989	17.6646	13.4919	2.60732	21.9364	3.43878	0.164384	0.292824
23_DIG-1B-T3 47	4.7	0.193811	4.72289	0	10.8	23.4872	12.8419	2.75265	29.0457	4.80457	0.983297	11.8628
26_DIG-1B-T3 50	5	0.196193	107.994	0.0481658	29.6853	66.5752	13.2417	0.714952	53.3293	13.2061	0.118199	0.0397221
27_DIG-1B-T3 51	5.1	0.403022	103.507	0.0548958	79.4665	180.258	13.3926	0.427443	60.0617	35.3521	0.330128	0.198533
30_DIG-1B-T3 53	5.3	0.115808	-65.6509	0.0596364	18.9105	38.492	12.0223	1.95563	52.8037	8.41267	-0.12386	0.135818
31_DIG-1B-T3 54	5.4	0.0327156	4.11314	0.0366343	5.57274	14.025	14.8529	3.78667	59.0614	2.47913	0.582591	5.67074
32_DIG-1B-T3 55	5.55	0.0107004	47.4761	0.0659635	4.15943	15.2806	21.6406	4.85957	82.6744	1.8504	0.0376727	0.0299752
5_DIG-1B-T3 57	5.7	0.025772	-15.8319	0	3.39126	6.79082	11.8278	18.7988	47.0301	1.50866	-0.0921078	0.738119
6_DIG-1B-T3 60	5.7	0.0319332	-61.1841	0.0107821	2.24344	-0.710895	-1.87881	26.6361	-8.12722	0.998034	-0.0157668	0.0304009
		5.76838	572.779	0.686358	224.786	517.705
Diggi	DIG-1B-T4		J = 0.00383290 ± 0.00000690
Incremental Heating		36Ar(a) [V]	37Ar(ca) [V]	38Ar(cl) [V]	39Ar(k) [V]	40Ar(r) [V]	Age	± 2σ	40Ar(r)	39Ar(k)	K/Ca	± 2σ
							(Ma)		(%)	(%)
2_DIG-1B-T4 CRYPTO 3.5	3.5	0.207278	0	0.0235398	0.72591	0.841993	8.02166	28.819	1.34243	0.0674859	-0.282085	0.777566
3_DIG-1B-T4 CRYPTO 4.0	4	4.35633	0.160558	0.423572	22.3081	43.069	13.3322	5.80567	3.20537	2.07392	59.7448	16.6577
10_DIG-1B-T4 CRYPTO 4.4	4.4	1.94878	0.066462	0.146206	25.5194	40.4659	10.9573	3.284	6.50133	2.37246	165.107	124.07
11_DIG-1B-T4 CRYPTO 4.6	4.6	0.758179	0.0765817	0.12753	17.4206	21.226	8.4255	3.78352	8.56884	1.61954	97.8151	107.518
12_DIG-1B-T4 CRYPTO 4.8	4.8	0.464906	0.190791	0.210451	14.8796	9.27578	4.31563	4.28921	6.2592	1.38331	33.5352	9.97289
14_DIG-1B-T4 CRYPTO 5.2	5.2	0.444843	0.275781	0.278427	21.9495	10.1253	3.1945	2.90168	7.07455	2.04059	34.2239	6.06263
15_DIG-1B-T4 CRYPTO 5.5	5.5	0.316447	0.352614	0.446497	20.157	2.63034	0.904233	3.12399	2.70374	1.87394	24.5807	3.60046
18_DIG-1B-T4 CRYPTO 6.0	6	0.195742	0.157385	0.157151	28.6637	40.1442	9.68121	2.17216	40.6109	2.66478	78.3135	24.4209
19_DIG-1B-T4 CRYPTO 6.4	6.4	0.227153	0.0932692	0.138092	63.1497	108.056	11.8212	0.989249	61.2309	5.87085	291.14	151.668
20_DIG-1B-T4 CRYPTO 6.7	6.7	0.511815	0.0849157	0.0661591	176.252	313.675	12.2934	0.364122	67.0018	16.3857	892.512	1030.68
22_DIG-1B-T4 CRYPTO 6.8	6.8	0.655203	0.0854979	0	318.254	576.727	12.5168	0.207741	74.3791	29.5872	1600.61	1595.55
23_DIG-1B-T4 CRYPTO 6.9	6.9	0.288344	0.0687317	0.0191301	143.514	253.43	12.1984	0.437427	74.3434	13.3421	897.853	628.419
24_DIG-1B-T4 CRYPTO 7.1	7.1	0.23993	0.0482547	0.0194076	100.266	174.785	12.0423	0.624139	70.6558	9.32142	893.472	876.411
26_DIG-1B-T4 CRYPTO 7.5	7.5	0.124129	0.00107917	0.0283569	37.2731	60.1059	11.1426	1.66614	61.6346	3.46517	14851.6	847819
27_DIG-1B-T4 CRYPTO 7.8	7.8	0.155929	0.0697633	0.085911	34.5834	50.8088	10.1544	1.79723	52.0109	3.21513	213.162	146.915
28_DIG-1B-T4 CRYPTO 8.1	8.1	0.114424	0.0822211	0.0785009	21.4966	28.3729	9.12516	2.88898	45.2253	1.99848	112.423	72.7458
5_DIG-1B-T4 CRYPTO 8.1	12	0.11224	0.0187025	0	29.236	45.0975	10.66	1.45507	57.169	2.71799	672.182	2342.98
		11.1217	1.83261	2.24893	1075.65	1778.84
Terali	TER-1A-T1		J = 0.00315870 ± 0.00000790
Incremental Heating		36Ar(a) [V]	37Ar(ca) [V]	38Ar(cl) [V]	39Ar(k) [V]	40Ar(r) [V]	Age	± 2σ	40Ar(r)	39Ar(k)	K/Ca	± 2σ
							(Ma)		(%)	(%)
18_TER1AT1-A4-35	3.5	0.0128434	0.108395	0.0187517	0.378516	1.83488	27.4791	15.9852	32.5693	0.0944066	1.50156	1.62498
19_TER1AT1-A4-45	4.5	3.04991	0.620444	0.0719201	19.4063	77.0433	22.5355	7.20301	7.87378	4.84017	13.4496	3.35894
21_TER1AT1-A4-50	5	2.25186	0.543781	0.0885716	16.6008	76.704	26.2012	6.15984	10.3334	4.14045	13.1272	2.95133
22_TER1AT1-A4-60	6	0.617227	0.571585	0.045786	14.8486	68.3374	26.0986	1.97759	27.24	3.70344	11.1706	1.8638
24_TER1AT1-A4-70	7	0.132122	0.00984889	0.0422359	15.4271	73.5775	27.0392	0.582211	65.2462	3.8477	673.542	8010.04
25_TER1AT1-A4-80	8	0.184023	0.684504	0.00255722	37.826	189.31	28.3632	0.340849	77.5685	9.43429	23.762	3.69775
27_TER1AT1-A4-85	8.5	0.936309	2.16492	0	108.498	559.02	29.1931	0.439509	66.8084	27.0607	21.55	1.12034
28_TER1AT1-A4-90	9	0.620905	1.69802	0	99.1634	501.114	28.6368	0.349664	73.0964	24.7326	25.1117	1.63225
32_TER1AT1-A4-100	10	0.392308	1.12144	0	64.792	318.763	27.8854	0.344303	73.2254	16.1599	24.8436	2.60297
33_TER1AT1-A4-110	11	0.219139	0.477165	0.0153585	24.0016	113.627	26.8408	0.548339	63.6154	5.98631	21.6292	6.0855
		8.41665	8.00011	0.285181	400.942	1979.33
Terali	TER-1A-T2		J = 0.00383290 ± 0.00000690
Incremental Heating		36Ar(a) [V]	37Ar(ca) [V]	38Ar(cl) [V]	39Ar(k) [V]	40Ar(r) [V]	Age	± 2σ	40Ar(r)	39Ar(k)	K/Ca	± 2σ
							(Ma)		(%)	(%)
6_TER-1A-T2 CRYPTO 3.7	3.7	0.142747	0	0	1.12824	9.50464	57.4669	12.3468	18.2342	0.101016	-0.653993	1.97793
7_TER-1A-T2 CRYPTO 4.0	4	0.797678	0.205995	0.190182	14.4151	38.5312	18.4324	1.75613	13.9214	1.29064	30.0905	5.90184
9_TER-1A-T2 CRYPTO 4.3	4.3	1.27711	0.367333	0.334668	22.1191	58.6273	18.2784	1.55089	13.3226	1.98041	25.8927	3.31395
10_TER-1A-T2 CRYPTO 4.5	4.5	0.641138	0.185473	0.171082	13.0598	37.6177	19.8551	1.72275	16.4181	1.1693	30.2778	6.08303
11_TER-1A-T2 CRYPTO 4.8	4.8	0.578959	0.224823	0.215098	16.0113	47.8024	20.5756	1.27271	21.6519	1.43355	30.6235	5.13675
13_TER-1A-T2 CRYPTO 5.1	5.1	0.288198	0.121852	0.110507	13.5859	48.1872	24.418	1.12474	35.868	1.2164	47.943	16.1564
14_TER-1A-T2 CRYPTO 5.5	5.5	0.255042	0.153154	0.126448	18.9291	60.0075	21.84	0.818418	44.0193	1.6948	53.1458	12.3771
15_TER-1A-T2 CRYPTO 6	6	0.201941	0.209692	0.129605	23.5322	74.5269	21.8187	0.644068	55.1911	2.10693	48.2558	9.26414
17_TER-1A-T2 CRYPTO 6.7	6.7	0.275146	0.164975	0.0755621	79.8705	321.652	27.6995	0.202425	79.5072	7.15111	208.179	47.6754
18_TER-1A-T2 CRYPTO 7	7	0.338794	0.16251	0.00500734	137.971	629.147	31.3329	0.141375	85.9944	12.353	365.069	92.113
19_TER-1A-T2 CRYPTO 7.1	7.1	0.330698	0.143921	0.0436007	192.602	895.982	31.9593	0.111926	89.9073	17.2444	575.444	144.197
21_TER-1A-T2 CRYPTO 7.2	7.2	0.188297	0.057292	0	163.914	780.437	32.7033	0.121678	93.1051	14.6758	1230.24	855.271
22_TER-1A-T2 CRYPTO 7.4	7.4	0.106734	0.0434646	0	107.591	506.921	32.3649	0.153671	93.9049	9.63304	1064.41	1348.17
23_TER-1A-T2 CRYPTO 7.5	7.5	0.0735242	0.0589473	0	79.5222	374.027	32.3095	0.19554	94.274	7.11993	580.087	372.232
25_TER-1A-T2 CRYPTO 78	7.8	0.0727981	0.106771	0.0373647	85.2495	393.531	31.7157	0.1799	94.5789	7.63271	343.326	112.873
26_TER-1A-T2 CRYPTO 9	9	0.0762052	0.0386898	0.0560728	79.1282	359.085	31.183	0.1907	93.8541	7.08465	879.433	1596.69
5_TER-1A-T2 CRYPTO 10	10	0.0731586	0.0577541	0.080194	45.0132	190.227	29.0563	0.773304	89.5181	4.0302	335.139	207.716
6_TER-1A-T2 CRYPTO 13	13	0.066869	0.0572879	0.0862044	23.2551	82.5929	24.4504	1.48175	80.36	2.08212	174.552	101.579
		5.78503	2.35994	1.6616	1116.9	4908.41
Terali	TER-1B-T3		J = 0.00320260 ± 0.00000608
Incremental Heating		36Ar(a) [V]	37Ar(ca) [V]	38Ar(cl) [V]	39Ar(k) [V]	40Ar(r) [V]	Age	± 2σ	40Ar(r)	39Ar(k)	K/Ca	± 2σ
							(Ma)		(%)	(%)
3_TER-1B-T3 A5 35	3.5	1.94054	-2.71259	0.00423686	23.4213	82.7626	20.3496	1.87343	12.6082	2.7268	-3.71274	2.62268
4_TER-1B-T3 A5 40	4	4.17755	-0.098364	0.162078	42.517	173.238	23.4445	2.23115	12.3028	4.95	-185.864	5235.92
6_TER-1B-T3 A5 42	4.2	1.14513	0.507444	0.00736863	26.0858	106.263	23.4389	1.10109	23.8846	3.03701	22.1047	125.264
7_TER-1B-T3 A5 45	4.5	0.285681	1.19682	0.0393521	21.0523	80.7589	22.0807	0.485151	48.8318	2.451	7.56382	25.0058
9_TER-1B-T3 A5 50	5	0.173141	-0.822672	0	22.6713	94.282	23.9251	0.382649	64.7253	2.63948	-11.85	50.5307
10_TER-1B-T3 A5 60	6	0.432399	2.9023	0	142.067	678.428	27.4465	0.113701	84.0077	16.54	21.0484	16.456
12_TER-1B-T3 A5 65	6.5	0.539759	0.0292336	0	347.168	1677.43	27.7679	0.0889409	91.1502	40.4187	5106.52	370917
13_TER-1B-T3 A5 70	7	0.154114	0.524349	0	134.854	641.991	27.3623	0.0966198	93.1991	15.7003	110.589	482.828
15_TER-1B-T3 A5 75	7.5	0.183035	0.103288	0	60.1128	245.108	23.4611	0.147516	81.7633	6.99857	250.256	4904.24
16_TER-1B-T3 A5 85	8.5	0.257231	-0.547195	0.0419787	27.5582	92.184	19.2694	0.326484	54.7207	3.20843	-21.6559	73.5687
18_TER-1B-T3 A5 95	9.5	0.053796	-2.80374	0	9.50686	39.301	23.784	0.746717	71.0818	1.10683	-1.45804	1.63703
19_TER-1B-T3 A5 105	10.5	0.0236822	-1.9649	0.00344718	1.9144	8.15257	24.4959	3.66947	53.7441	0.222883	-0.418949	0.669557
		9.36606	-3.68602	0.258462	858.929	3919.9
Nagari	NAG-1B-T2		J = 0.00327710 ± 0.00000590
Incremental Heating		36Ar(a) [V]	37Ar(ca) [V]	38Ar(cl) [V]	39Ar(k) [V]	40Ar(r) [V]	Age	± 2σ	40Ar(r)	39Ar(k)	K/Ca	± 2σ
							(Ma)		(%)	(%)
8_NAG1BT2-40	4	3.18069	458.247	0.428267	15.2513	77.103	29.7137	8.04267	7.58033	8.5332	0.0143112	0.00174719
9_NAG1BT2-43	4.3	1.09753	334.568	0.281613	14.1756	75.4254	31.2594	7.35894	18.8619	7.93138	0.0182191	0.00330022
11_NAG1BT2-45	4.5	0.149578	88.3846	0.0311405	10.8722	48.1604	26.0618	9.1111	52.0844	6.08306	0.0528942	0.0412541
12_NAG1BT2-50	5	0.23323	49.8187	0.0480085	48.6408	269.675	32.5603	2.05965	79.5347	27.2149	0.419833	0.641896
2_NAG1BT2-53	5.3	0.22301	51.1618	0.0836067	70.3749	495.652	41.2628	1.40933	88.1577	39.3753	0.591481	0.822183
3_NAG1BT2-55	5.5	0.0263641	86.0591	0	15.3692	104.827	39.974	6.43015	92.9593	8.59916	0.0767932	0.0635223
5_NAG1BT2-57	5.7	0.0146194	-2.18478	0.0139438	3.98566	27.8812	40.9868	24.8612	86.4805	2.23001	-0.784444	26.4406
6_NAG1BT2-60	6	-0.00181618	-7.9609	0.0349164	0.0590563	1.08434	105.661	1644.88	197.788	0.0330424	-0.00318987	0.0285869
		4.92321	1058.09	0.921496	178.729	1099.81
Nagari	NAG-3A-T3		J = 0.00378940 ± 0.00000455
Incremental Heating		36Ar(a) [V]	37Ar(ca) [V]	38Ar(cl) [V]	39Ar(k) [V]	40Ar(r) [V]	Age	± 2σ	40Ar(r)	39Ar(k)	K/Ca	± 2σ
							(Ma)		(%)	(%)
24_NAG-3A-T3 3.5	3.5	10.4163	0.417643	0.388831	5.71127	12.4739	14.9047	33.7299	0.403613	4.36993	5.88026	1.40483
25_NAG-3A-T3 4.0	4	6.58372	0.47036	0.114824	6.14807	14.6772	16.2852	19.5861	0.748752	4.70414	5.62052	1.21359
26_NAG-3A-T3 4.5	4.5	2.76771	0.621874	0.0880444	4.60763	17.5404	25.8996	11.3913	2.09953	3.52548	3.18598	0.5146
28_NAG-3A-T3 4.8	4.8	1.0941	0.577677	0	4.39176	20.1558	31.1787	4.90588	5.86771	3.36031	3.26905	0.573824
29_NAG-3A-T3 5.1	5.1	0.668919	0.722512	0	6.57811	46.5057	47.8076	2.49454	19.0414	5.03318	3.91493	0.571526
30_NAG-3A-T3 5.4	5.4	0.57858	0.74298	0	8.74197	69.9517	54.0171	1.64932	29.0248	6.68884	5.05942	0.680358
32_NAG-3A-T3 5.7	5.7	0.279146	1.81838	0.0410659	36.4724	270.19	50.0638	0.321202	76.5344	27.9065	8.62477	0.483993
33_NAG-3A-T3 6.0	6	0.34324	2.50633	0.0305585	25.1997	138.383	37.2437	0.426712	57.6465	19.2814	4.32341	0.172822
34_NAG-3A-T3 6.3	6.3	0.526442	2.80429	0.0904985	14.7059	68.0221	31.4213	0.84161	30.4039	11.2521	2.25496	0.0824648
36_NAG-3A-T3 6.6	6.6	0.654175	2.78088	0.00660217	11.1244	49.6951	30.3552	1.36385	20.4412	8.51172	1.72014	0.0662614
37_NAG-3A-T3 6.9	6.9	0.423684	1.54086	0	5.58982	26.9539	32.744	1.92182	17.7088	4.277	1.55992	0.107975
38_NAG-3A-T3 7.5	7.5	0.0761879	0.269619	0	1.42377	6.0415	28.8457	5.03593	21.1472	1.08939	2.27069	0.858258
		24.4123	15.2734	0.760425	130.695	740.591
Nagari	NAG-3B-T1		J = 0.00320260 ± 0.00000608
Incremental Heating		36Ar(a) [V]	37Ar(ca) [V]	38Ar(cl) [V]	39Ar(k) [V]	40Ar(r) [V]	Age	± 2σ	40Ar(r)	39Ar(k)	K/Ca	± 2σ
							(Ma)		(%)	(%)
14_NAG-3B-T1 A3 35	3.5	8.50912	0.573269	0.236704	4.31627	72.5255	94.7825	56.9805	2.80345	2.89697	3.23756	22.6908
4_NAG-3B-T1 A3 40	4	7.0433	3.14642	0.208782	10.9427	118.749	61.7795	21.4799	5.39732	7.34445	1.49546	3.60143
5_NAG-3B-T1 A3 43	4.3	6.9218	-0.122287	0.162978	9.78328	107.745	62.6818	23.8737	5.00388	6.56629	-34.4013	1940.27
7_NAG-3B-T1 A3 45	4.5	0.631159	4.37601	0.00763897	13.9327	96.9489	39.8557	10.6578	34.1861	9.35128	1.36907	2.16146
8_NAG-3B-T1 A3 50	5	0.214992	2.33251	0.0153093	10.3564	72.6517	40.1775	2.97959	53.3098	6.95093	1.90921	3.63198
10_NAG-3B-T1 A3 60	6	0.0916068	-1.50601	0.0222685	12.7924	90.2085	40.3844	2.31402	76.8371	8.58594	-3.65251	10.6053
11_NAG-3B-T1 A3 70	7	0.049589	1.00104	0	22.0558	171.864	44.5734	1.33787	92.0382	14.8033	9.47421	36.8384
13_NAG-3B-T1 A3 80	8	0.055934	2.48802	0	28.0996	222.199	45.225	1.05071	92.9704	18.8597	4.85641	7.66062
14_NAG-3B-T1 A3 90	9	0.024007	2.45243	0	14.2482	116.37	46.6915	2.05478	94.1489	9.56304	2.49823	5.01688
16_NAG-3B-T1 A3 100	10	0.0185357	1.56784	0	7.37308	55.1928	42.8407	3.9674	90.865	4.94862	2.02216	6.08644
17_NAG-3B-T1 A3 110	11	0.0243344	3.89668	0	7.13984	52.5387	42.1212	4.08958	87.8593	4.79208	0.787883	0.838697
19_NAG-3B-T1 A3 120	12	0.0257955	2.2265	0.0347601	4.97039	34.7786	40.0755	5.89239	81.9297	3.336	0.959923	1.92135
20_NAG-3B-T1 A3 130	13	0.0225461	1.35619	0	2.9819	19.9566	38.3494	9.79861	74.8901	2.00138	0.945457	3.10987
		23.6327	23.7886	0.688441	148.993	1231.73
Nagari	NAG-3B-T2		J = 0.00327710 ± 0.00000590
Incremental Heating		36Ar(a) [V]	37Ar(ca) [V]	38Ar(cl) [V]	39Ar(k) [V]	40Ar(r) [V]	Age	± 2σ	40Ar(r)	39Ar(k)	K/Ca	± 2σ
							(Ma)		(%)	(%)
9_NAG3BT2-40	4	0.00194214	-3.50169	0	0.0318803	-0.537551	-102.789	3357.22	-1466.29	0.0079705	-0.00391482	0.182701
10_NAG3BT2-45	4.5	43.5207	3919.45	3.4468	14.5944	263.615	103.992	65.9758	2.00863	3.6488	0.00160114	0.000158608
6_NAG-3B-T2 4.7	4.7	0.814289	477.092	0.340682	42.4012	272.609	37.7044	2.43924	53.0738	10.6009	0.038216	0.0130485
7_NAG-3B-T2 5.0	5	0.103381	228.998	0.0722349	64.4359	476.854	43.3319	1.55953	93.8638	16.1099	0.120994	0.0889434
8_NAG-3B-T2 5.3	5.3	0.113807	89.7278	0	154.595	1173.75	44.4426	0.650248	97.0942	38.6508	0.740859	1.36942
10_NAG-3B-T2 5.4	5.4	0.0694789	66.2592	0	91.7847	673.578	42.9745	1.08455	96.9179	22.9474	0.595652	1.50002
11_NAG-3B-T2 5.6	5.6	0.0163864	119.631	0.0580438	19.7234	128.692	38.2588	5.24991	96.2361	4.93112	0.0708934	0.10533
12_NAG-3B-T2 6.0	6	0.0568823	-97.7441	0.0160472	8.82469	39.8969	26.5954	11.1227	70.252	2.20629	-0.038822	0.0651698
14_NAG-3B-T2 7.0	7	0.00999985	5.03166	0.053749	3.58728	23.0492	37.6809	27.3579	88.5183	0.896869	0.306565	10.0686
		44.7069	4804.94	3.98755	399.978	3051.51
Nagari	NAG-3B-T3		J = 0.00320260 ± 0.00000608
Incremental Heating		36Ar(a) [V]	37Ar(ca) [V]	38Ar(cl) [V]	39Ar(k) [V]	40Ar(r) [V]	Age	± 2σ	40Ar(r)	39Ar(k)	K/Ca	± 2σ
							(Ma)		(%)	(%)
22_NAG-3B-T3 A4 35	3.5	17.3979	0.365166	0.372555	1.60203	113.101	368.602	234.876	2.15258	1.73988	1.88646	14.6423
23_NAG-3B-T3 A4 40	4	6.85617	5.90547	0.237765	1.81662	62.1242	187.936	93.4704	2.9751	1.97293	0.132275	0.062441
25_NAG-3B-T3 A4 45	4.5	11.494	-1.14029	0.33914	2.26835	66.8267	163.039	125.605	1.92955	2.46352	-0.85539	2.36842
26_NAG-3B-T3 A4 50	5	7.33885	-2.82041	0.218917	5.0694	58.9247	66.0933	37.9804	2.6452	5.50559	-0.772882	0.630947
28_NAG-3B-T3 A4 55	5.5	5.11256	1.51662	0.0884384	3.79308	45.3754	67.9857	36.4838	2.91584	4.11945	1.07543	1.76477
29_NAG-3B-T3 A4 60	6	1.25998	-0.352228	0.131983	4.5661	32.3716	40.5986	11.3575	7.99811	4.95899	-5.5743	43.0055
31_NAG-3B-T3 A4 70	7	0.601639	2.2513	0.082904	4.45077	29.1501	37.5377	9.3798	14.0837	4.83373	0.850101	1.24873
32_NAG-3B-T3 A4 80	8	0.545089	-2.07467	0.0559087	17.7366	147.484	47.5259	2.33105	47.7712	19.2628	-3.67613	6.47275
4_NAG-3B-T3 A4 85	8.5	0.190761	3.26082	0	13.9386	110.627	45.3895	2.80645	66.1913	15.138	1.83807	1.76619
5_NAG-3B-T3 A4 90	9	0.215578	3.16713	0.0296952	15.8368	115.203	41.645	2.4675	64.3377	17.1995	2.15016	2.15639
7_NAG-3B-T3 A4 95	9.5	0.257544	1.66406	0.0338564	10.3073	64.6909	35.9871	3.81362	45.9142	11.1942	2.66346	3.56049
8_NAG-3B-T3 A4 100	10	0.234151	2.08303	0	6.38344	38.8561	34.9127	6.16325	35.9414	6.9327	1.31773	2.03239
10_NAG-3B-T3 A4 105	10.5	0.191922	-7.64904	0.0863429	2.68908	14.2455	30.4224	14.5833	20.0685	2.92046	-0.15117	0.0468422
1_NAG-3B-T3 A4 110	11	0.0576621	-1.20252	0.0507081	1.61899	9.43035	33.4226	23.9956	35.6061	1.7583	-0.578923	1.22087
		51.7538	4.97445	1.72821	92.0773	908.41
Ilva	ILB-1B-T4		J = 0.00327710 ± 0.00000590
Incremental Heating		36Ar(a) [V]	37Ar(ca) [V]	38Ar(cl) [V]	39Ar(k) [V]	40Ar(r) [V]	Age	± 2σ	40Ar(r)	39Ar(k)	K/Ca	± 2σ
							(Ma)		(%)	(%)
27_ILV-1B-T4 35	3.5	0.0304224	-149.476	0	0.0109752	-10.966	0	130057	554.939	0.00405718	-3.15727e-05	0.00157664
28_ILV-1B-T4 38	3.8	2.54785	402.585	0.358825	34.6594	74.9492	12.7696	3.72077	9.04991	12.8124	0.0370197	0.0132811
29_ILV-1B-T4 40	4	0.152845	194.903	0.128863	23.5232	52.9243	13.2839	4.6187	53.8297	8.69576	0.0518976	0.0370743
5_ILV-1B-T4 41	4.1	0.0122488	54.206	0.005434	22.344	48.9163	12.9272	3.16159	92.7282	8.25984	0.177248	0.458089
6_ILV-1B-T4 42	4.2	0.00833252	102.474	0.0094927	49.3872	117.906	14.0927	1.50822	97.5665	18.2568	0.207237	0.298273
7_ILV-1B-T4 43	4.3	0.0671905	-116.095	0	51.2813	104.695	12.0582	1.49995	83.7247	18.957	-0.189939	0.24896
9_ILV-1B-T4 45	4.5	0.0365667	-46.1729	0	41.5609	86.65	12.3131	1.67288	88.5465	15.3637	-0.38705	1.1555
10_ILV-1B-T4 47	4.7	0.0309717	-57.6011	0.016004	24.8173	47.4783	11.3018	2.64098	83.4843	9.17414	-0.185265	0.417331
11_ILV-1B-T4 50	5	0.027681	-66.7815	0.0365882	9.58684	13.3901	8.25809	7.40828	61.8116	3.54394	-0.0617288	0.129896
13_ILV-1B-T4 55	5.5	0.011639	-29.4337	0	5.62182	8.45011	8.88552	11.8556	70.7483	2.0782	-0.0821296	0.368209
14_ILV-1B-T4 60	6	0.0240466	-80.6677	0.00473772	4.7939	3.07585	3.79825	13.7541	30.0726	1.77215	-0.0255539	0.0411561
15_ILV-1B-T4 70	7	-0.0162192	64.3167	0	2.9268	11.1277	22.3916	22.1121	174.873	1.08194	0.0195676	0.0391819
		2.93358	272.257	0.559944	270.514	558.597
Ilva	ILB-1B-T5		J = 0.00380340 ± 0.00000913
Incremental Heating		36Ar(a) [V]	37Ar(ca) [V]	38Ar(cl) [V]	39Ar(k) [V]	40Ar(r) [V]	Age	± 2σ	40Ar(r)	39Ar(k)	K/Ca	± 2σ
							(Ma)		(%)	(%)
27_ILV-1B-T5 3.5	3.5	6.26401	0.207577	0.628303	10.7766	139.61	86.975	14.3678	7.01301	1.2426	22.324	3.87105
28_ILV-1B-T5 4.0	4	6.76703	0.517905	0.553572	36.7983	83.4331	15.5271	4.73921	4.00457	4.24302	30.5525	1.66449
30_ILV-1B-T5 4.5	4.5	2.15101	0.489438	0.138996	43.3437	63.0898	9.98345	1.28743	9.02399	4.99773	38.08	2.54733
32_ILV-1B-T5 4.8	4.8	0.134399	0.307162	0.109375	36.8394	57.1764	10.6432	0.198828	58.7942	4.24776	51.572	3.92919
33_ILV-1B-T5 5.1	5.1	0.0703226	0.476987	0.110726	54.3846	84.9396	10.7101	0.127655	79.9455	6.2708	49.0272	2.92731
34_ILV-1B-T5 5.4	5.4	0.108537	1.47974	0.054336	176.842	322.134	12.4852	0.0517309	90.5073	20.3907	51.3889	1.23093
5_ILV-1B-T5 5.7	5.7	0.128136	2.38242	0.0512427	280.58	502.1	12.2661	0.0418546	92.5218	32.3523	50.6416	1.99004
6_ILV-1B-T5 6.0	6	0.0603464	1.23269	0	146.05	261.328	12.2648	0.0502686	93.14	16.8402	50.9466	3.74204
7_ILV-1B-T5 6.3	6.3	0.0198809	0.263429	0.0257814	29.7177	53.8366	12.417	0.187411	89.7286	3.42659	48.5087	16.9961
9_ILV-1B-T5 6.6	6.6	0.00903896	0.0872289	0.0434164	15.6828	37.0666	16.1831	0.324789	92.923	1.80831	77.3094	80.8277
10_ILV-1B-T5 6.9	6.9	0.00395749	0.0477551	0	7.33759	19.6457	18.3214	0.677341	94.0605	0.846058	66.0697	128.824
11_ILV-1B-T5 7.2	7.2	0.0032382	0.0143756	0.055126	4.658	13.3815	19.6513	1.10214	93.0335	0.53709	139.329	867.04
13_ILV-1B-T5 8.0	8	0.00404305	0.0132319	0.011229	10.1089	32.3371	21.8683	0.525883	96.1562	1.16561	328.511	2265.47
14_ILV-1B-T5 8.5	8.5	0.00280318	0.0317035	0.0463177	7.76294	28.5643	25.1318	0.666725	96.9337	0.895104	105.29	300.422
15_ILV-1B-T5 9.0	9	0.00458091	0.0169326	0.0610624	6.38412	24.6216	26.3327	0.823592	94.5634	0.736119	162.123	866.865
		15.7313	7.56858	1.88948	867.267	1723.26
Ilva	ILB-2C-T3		J = 0.00327710 ± 0.00000590
Incremental Heating		36Ar(a) [V]	37Ar(ca) [V]	38Ar(cl) [V]	39Ar(k) [V]	40Ar(r) [V]	Age	± 2σ	40Ar(r)	39Ar(k)	K/Ca	± 2σ
							(Ma)		(%)	(%)
5_ILV2CT3-40	4	0.512208	216.295	0.227016	20.6217	46.6634	13.3601	6.83249	23.5412	8.85007	0.0409966	0.0409429
6_ILV2CT3-43	4.3	0.336435	333.624	0.285617	9.70725	32.3247	19.6266	14.5446	24.519	4.16598	0.0125114	0.00813724
8_ILV2CT3-45	4.5	0.0938106	65.1301	0.125009	7.15268	15.893	13.1197	19.6172	36.3822	3.06966	0.0472233	0.157249
9_ILV2CT3-50	5	0.160001	10.0926	0.128293	14.386	26.7823	10.9989	9.78429	36.0937	6.17394	0.612924	13.2261
11_ILV2CT3-55	5.5	0.124365	64.8749	0.04126	77.6538	162.465	12.356	1.81446	81.2457	33.3261	0.5147	1.73142
12_ILV2CT3-60	6	0.210687	26.7227	0.0170997	61.7333	121.716	11.6464	2.27123	65.9449	26.4936	0.993361	8.04705
14_ILV2CT3-65	6.5	0.220207	-63.8959	0	18.0203	28.9651	9.50027	7.83168	30.7449	7.73363	-0.121271	0.414607
15_ILV2CT3-70	7	0.429007	8.67961	0.00905666	16.8363	33.2857	11.6781	8.42287	20.775	7.22552	0.834096	21.1499
17_ILV2CT3-75	7.5	0.274962	-126.986	0	6.09854	2.83487	2.75259	23.541	3.36902	2.61726	-0.0206508	0.0363063
18_ILV2CT3-80	8	0.0487959	-98.2264	0	0.802271	-2.78568	-20.6947	178.26	-23.9293	0.344304	-0.00351205	0.0080398
		2.41048	436.31	0.833352	233.012	468.144
Ilva	ILB-2C-T4		J = 0.00317070 ± 0.00000793
Incremental Heating		36Ar(a) [V]	37Ar(ca) [V]	38Ar(cl) [V]	39Ar(k) [V]	40Ar(r) [V]	Age	± 2σ	40Ar(r)	39Ar(k)	K/Ca	± 2σ
							(Ma)		(%)	(%)
25_ILV2CT4-A7-35	3.5	0.24483	-0.104171	0	4.55357	12.0593	15.1211	13.117	14.2797	1.21861	-18.7963	24.3799
26_ILV2CT4-A7-45	4.5	0.790851	0.584162	0	8.76098	22.838	14.8849	7.16151	8.89957	2.34459	6.44893	2.32719
4_ILV2CT4-A7-55	5.5	0.640784	0.738342	0.00541272	9.17737	19.6699	12.2473	6.85992	9.40644	2.45602	5.34477	0.926053
5_ILV2CT4-A7-65	6.5	0.139624	0.865547	0.0281324	9.96597	19.5433	11.2089	5.99609	32.0915	2.66707	4.95105	0.781279
7_ILV2CT4-A7-75	7.5	0.052157	0.355607	0	2.94046	6.13716	11.9275	20.257	28.4417	0.786918	3.55561	1.05956
8_ILV2CT4-A7-85	8.5	0.216743	1.35683	0.0213212	20.7092	47.7477	13.1716	2.88791	42.6335	5.54213	6.56306	0.68173
10_ILV2CT4-A7-95	9.5	0.274194	2.97215	0	138.069	316.143	13.0811	0.438168	79.3322	36.9497	19.9754	1.29094
11_ILV2CT4-A7-100	10	0.229924	3.05245	0	124.394	278.755	12.8031	0.484181	80.1244	33.29	17.5235	0.841032
13_ILV2CT4-A7-110	11	0.203098	1.69327	0	35.7998	79.0178	12.6113	1.6706	56.6923	9.58064	9.09121	0.512071
14_ILV2CT4-A7-120	12	0.333349	2.18036	0	10.6804	21.785	11.6573	5.65071	18.0949	2.85827	2.10634	0.107872
16_ILV2CT4-A7-130	13	0.415816	2.51648	0.0511937	5.23723	12.086	13.1834	11.5866	8.95192	1.40157	0.894905	0.058353
17_ILV2CT4-A7-140	14	0.349374	1.95981	0	3.37956	9.3392	15.7755	17.8124	8.29326	0.904429	0.741508	0.0440334
		3.89074	18.1708	0.10606	373.668	845.122
Ilva	ILB-3A-T1		J = 0.00320650 ± 0.00000609
Incremental Heating		36Ar(a) [V]	37Ar(ca) [V]	38Ar(cl) [V]	39Ar(k) [V]	40Ar(r) [V]	Age	± 2σ	40Ar(r)	39Ar(k)	K/Ca	± 2σ
							(Ma)		(%)	(%)
4_ILV-3A-T1 A7 35	3.5	4.62731	0.697023	0.207662	29.8643	80.3813	15.5397	3.91102	5.55103	6.80173	18.4236	153.509
5_ILV-3A-T1 A8 40	4	3.58139	-3.00951	0.136842	24.7606	53.4382	12.4709	3.57546	4.80568	5.63935	-3.53782	6.3906
7_ILV-3A-T1 A8 45	4.5	1.54436	-2.44953	0.0681975	20.7011	42.0995	11.7538	1.81052	8.44255	4.71478	-3.63396	8.98592
8_ILV-3A-T1 A8 50	5	0.474699	-1.65075	0.0642513	13.5798	24.062	10.245	1.10765	14.6303	3.09287	-3.53738	11.9048
10_ILV-3A-T1 A8 60	6	0.769326	0.581374	0	28.9842	71.7642	14.2999	0.69224	23.9709	6.60128	21.4375	217.851
11_ILV-3A-T1 A8 65	6.5	0.302779	-1.343	0	164.148	382.542	13.4627	0.0822873	80.7726	37.3854	-52.5566	217.145
13_ILV-3A-T1 A8 67	6.7	0.163185	0.127893	0	113.179	255.302	13.0325	0.092425	83.81	25.7771	380.53	16655.7
14_ILV-3A-T1 A8 70	7	0.251957	-1.77555	0	20.1224	41.312	11.8653	0.523057	35.6261	4.58296	-4.87321	16.3436
16_ILV-3A-T1 A8 80	8	0.470338	-1.74544	0.0321569	8.04249	16.0111	11.5068	1.85652	10.3249	1.83171	-1.98132	6.38582
17_ILV-3A-T1 A8 90	9	0.0955696	-1.28055	0	9.79346	21.1863	12.5004	0.91549	42.7815	2.2305	-3.28859	15.5788
19_ILV-3A-T1 A8 100	10	0.0553536	-0.745041	0.0127661	4.04773	8.70143	12.422	2.16943	34.6703	0.921888	-2.33614	16.8712
20_ILV-3A-T1 A8 11	11	0.0342513	-1.65288	0.029654	1.84597	4.45507	13.9399	4.5636	30.5263	0.420428	-0.480233	1.62331
		12.3705	-14.2459	0.55153	439.069	1001.25
Ilva	ILB-3A-T3		J = 0.00383290 ± 0.00000690
Incremental Heating		36Ar(a) [V]	37Ar(ca) [V]	38Ar(cl) [V]	39Ar(k) [V]	40Ar(r) [V]	Age	± 2σ	40Ar(r)	39Ar(k)	K/Ca	± 2σ
							(Ma)		(%)	(%)
6_ILV-3A-T3 CRYPTO	3.7	1.75135	0.019201	0.508378	9.42427	5.00379	3.67631	12.1648	0.947916	2.30363	211.054	1073.79
7_ILV-3A-T3 CRYPTO 4	4	2.01235	0.292617	0.501414	13.3488	13.946	7.22672	8.87509	2.26851	3.26292	19.616	6.59872
10_ILV-3A-T3 CRYPTO 4.6	4.6	0.979715	0.196569	0.334041	16.3645	6.79027	2.8737	6.5405	2.26801	4.00007	35.7978	18.3813
11_ILV-3A-T3 CRYPTO 5	5	0.621964	0.224238	0.333703	18.8847	7.7695	2.84933	5.5563	4.01299	4.61609	36.2134	15.4509
12_ILV-3A-T3 CRYPTO 5.3	5.3	0.340133	0.173545	0.238691	13.2687	2.83577	1.48069	7.83739	2.71381	3.24335	32.8766	19.429
14_ILV-3A-T3 CRYPTO 5.7	5.7	0.450522	0.113362	0.125926	22.1665	31.051	9.68319	4.6934	18.7341	5.41828	84.0809	73.7971
17_ILV-3A-T3 CRYPTO 6	6	0.232152	0.0572397	0.0589072	51.1134	103.742	14.0133	2.02015	59.7818	12.4939	383.977	636.805
18_ILV-3A-T3 CRYPTO 6.2	6.2	0.0829348	0.0797101	0.0159225	150.209	302.27	13.8942	0.687698	92.0204	36.7163	810.307	963.5
19_ILV-3A-T3 CRYPTO 6.3	6.3	0.063576	0.0393674	0.0115	67.7859	141.749	14.436	1.52065	87.8338	16.5693	740.408	1862.41
21_ILV-3A-T3 CRYPTO 6.5	6.5	0.0845562	0.0883735	0	17.9167	47.9089	18.4393	5.7464	65.3399	4.37947	87.1775	95.1759
22_ILV-3A-T3 CRYPTO 6.9	6.9	0.203764	0.0923598	0	9.5274	52.1747	37.5638	10.809	46.1353	2.32883	44.3567	47.0225
23_ILV-3A-T3 CRYPTO 7.5	7.5	0.206019	0.070742	0.00183349	4.17851	63.4585	102.312	25.5676	50.7686	1.02138	25.3988	34.4337
25_ILV-3A-T3 CRYPTO 10	10	0.0500336	0.0146078	0	14.9179	135.319	61.8033	6.93921	89.9736	3.64646	439.128	2889.89
		7.07907	1.46193	2.13032	409.106	914.019
Ilva	ILB-3C-T4		J = 0.00327710 ± 0.00000590
Incremental Heating		36Ar(a) [V]	37Ar(ca) [V]	38Ar(cl) [V]	39Ar(k) [V]	40Ar(r) [V]	Age	± 2σ	40Ar(r)	39Ar(k)	K/Ca	± 2σ
							(Ma)		(%)	(%)
19_ILV3CT4-35	3.5	6.67116	673.116	0.721347	29.5413	69.5988	13.908	5.64454	3.40968	4.46239	0.0188716	0.00392564
21_ILV3CT4-40	4	7.92357	735.125	0.785813	45.0218	95.8386	12.571	4.24984	3.93153	6.8008	0.0263348	0.00505541
22_ILV3CT4-45	4.5	0.900043	355.114	0.326899	33.4025	78.5107	13.8755	2.51484	22.7701	5.04563	0.0404463	0.0160866
23_ILV3CT4-47	4.7	0.269644	187.25	0.172558	29.1918	62.3277	12.6087	2.81037	43.8031	4.40959	0.0670358	0.0523108
25_ILV3CT4-50	4.7	0.273259	187.469	0.176925	29.2382	61.9161	12.5059	2.8075	43.3139	4.4166	0.0670642	0.0523
26_ILV3CT4-53	5.3	0.226758	14.0069	0.0273086	267.177	615.28	13.5958	0.307531	89.8382	40.3586	8.20212	85.5476
27_ILV3CT4-55	5.5	0.125601	-28.3767	0	153.287	377.586	14.5388	0.531788	90.7252	23.1549	-2.3228	12.0127
29_ILV3CT4-57	5.7	0.119342	-198.02	0	42.6401	87.1108	12.0661	1.95292	70.9433	6.44103	-0.0925931	0.0698483
30_ILV3CT4-60	6	0.147313	-91.1991	0.0336769	28.5089	52.6725	10.9158	2.78047	54.5943	4.30643	-0.134418	0.209133
31_ILV3CT4-63	6.3	0.024408	8.83484	0.038745	3.99863	10.5202	15.5242	19.6627	59.1969	0.604016	0.194617	3.11365
		16.6811	1843.32	2.28327	662.007	1511.36
Ilva	ILB-6A-T1		J = 0.00379740 ± 0.00000911
Incremental Heating		36Ar(a) [V]	37Ar(ca) [V]	38Ar(cl) [V]	39Ar(k) [V]	40Ar(r) [V]	Age	± 2σ	40Ar(r)	39Ar(k)	K/Ca	± 2σ
							(Ma)		(%)	(%)
22_ILV-6A-T1	3.5	0.425642	0.0898281	0	7.52602	10.1831	9.26749	1.85094	7.48574	0.785593	36.0264	37.6065
23_ILV-6A-T1 4.0	4	1.95012	0.385699	0.109932	23.7897	34.4695	9.92238	2.26784	5.64185	2.48326	26.5222	6.41283
24_ILV-6A-T1 4.3	4.3	2.28988	0.337016	0.106606	13.269	21.318	10.9988	4.73061	3.05368	1.38507	16.93	4.72414
26_ILV-6A-T1 4.6	4.6	0.664316	0.292584	0.044634	14.7345	21.7013	10.0855	1.30158	9.94793	1.53805	21.6548	6.97816
27_ILV-6A-T1 4.9	4.9	0.368096	0.40359	0.110197	27.4936	44.1418	10.9915	0.440479	28.8168	2.86988	29.2927	7.33621
28_ILV-6A-T1 5.1	5.1	0.124827	0.431183	0	35.402	61.7061	11.9296	0.228627	62.37	3.6954	35.3049	7.51264
30_ILV-6A-T1 5.4	5.4	0.169415	1.2014	0.136886	93.1767	166.879	12.2569	0.0971092	76.6047	9.72613	33.3495	2.57259
31_ILV-6A-T1 5.7	5.7	0.358212	2.75773	0.102427	202.446	342.201	11.5703	0.0677828	76.0422	21.132	31.5665	1.11609
32_ILV-6A-T1 6.0	6	0.271321	3.30584	0.0277065	246.958	408.14	11.3133	0.0522154	83.1736	25.7784	32.1225	0.939668
34_ILV-6A-T1 6.3	6.3	0.183937	1.99528	0.0284739	147.892	242.224	11.2121	0.0672689	81.2804	15.4375	31.8719	1.50849
35_ILV-6A-T1 6.6	6.6	0.0959211	1.07217	0	83.4599	138.13	11.3295	0.095172	82.5725	8.71186	33.4722	3.10615
36_ILV-6A-T1 6.9	6.9	0.0502599	0.512502	0.0338597	37.6382	71.2295	12.949	0.18763	82.3977	3.92882	31.5792	5.67545
5_ILV-6A-T1 7.2	7.2	0.011779	0.148174	0	8.21485	28.7931	23.9098	0.411045	88.9956	0.857497	23.8395	9.20367
6_ILV-6A-T1 7.5	7.5	0.010892	0.134157	0	6.03241	22.3175	25.228	0.469553	87.1963	0.629685	19.3351	8.05173
7_ILV-6A-T1 7.8	7.8	0.00720325	0.145471	0.00726441	3.84247	12.2434	21.7489	0.706716	84.9693	0.401092	11.358	4.04904
9_ILV-6A-T1 8.5	8.5	0.00561602	0.165164	0.025215	3.33985	9.44669	19.3193	0.857334	84.8105	0.348626	8.69521	3.10406
10_ILV-6A-T1 10	10	0.00379789	0.110998	0.0501354	2.78921	8.77955	21.4867	0.975967	88.4246	0.291148	10.8053	5.75377
		6.99124	13.4888	0.783336	958.004	1643.9
Ilva	ILB-6A-T2		J = 0.00380140 ± 0.00000912
Incremental Heating		36Ar(a) [V]	37Ar(ca) [V]	38Ar(cl) [V]	39Ar(k) [V]	40Ar(r) [V]	Age	± 2σ	40Ar(r)	39Ar(k)	K/Ca	± 2σ
							(Ma)		(%)	(%)
17_ILV-6A-T2 3.5	3.5	20.2634	0.563432	0.785518	14.6192	-23.9666	-11.3047	36.0606	-0.401854	1.18135	11.1571	2.08499
18_ILV-6A-T2 4.0	4	10.7311	0.647511	0.426765	29.6456	45.4442	10.5069	9.32029	1.41273	2.39561	19.6871	2.5754
19_ILV-6A-T2 4.5	4.5	3.9051	0.757726	0.226116	36.0186	57.7795	10.9937	2.78799	4.76695	2.9106	20.4401	2.28073
22_ILV-6A-T2 4.8	4.8	1.20143	0.630124	0.164773	23.4574	26.2424	7.67399	1.44444	6.87887	1.89555	16.0074	2.04013
23_ILV-6A-T2 5.1	5.1	0.585877	0.734681	0.122468	24.589	27.0314	7.54121	0.723716	13.489	1.98699	14.3916	1.58052
24_ILV-6A-T2 5.4	5.4	0.40289	0.62127	0	36.1005	55.1325	10.4678	0.363564	31.588	2.91722	24.9863	3.22697
26_ILV-6A-T2 5.7	5.7	0.19203	0.88966	0.103336	51.5506	86.8834	11.5487	0.200354	60.2822	4.16571	24.916	2.2552
27_ILV-6A-T2 6.0	6	0.294177	2.86558	0.11453	200.19	345.065	11.8102	0.0640965	79.5201	16.177	30.04	0.932381
28_ILV-6A-T2 6.3	6.3	0.293297	5.24215	0	355.065	607.746	11.728	0.0438469	87.0876	28.6922	29.1251	0.504696
30_ILV-6A-T2 6.6	6.6	0.204423	4.19602	0	281.029	466.656	11.3788	0.0456113	88.0838	22.7094	28.7993	0.595595
31_ILV-6A-T2 6.9	6.9	0.11691	2.15445	0.0173523	138.975	230.369	11.359	0.0688703	86.5195	11.2303	27.7376	1.06406
32_ILV-6A-T2 7.1	7.1	0.0488924	0.626701	0.104407	29.0494	53.2958	12.568	0.272083	78.3474	2.34743	19.9317	2.56895
34_ILV-6A-T2 7.4	7.4	0.012105	0.179215	0	8.70197	19.7871	15.5637	0.984936	84.3856	0.703191	20.8791	9.45335
35_ILV-6A-T2 8.0	8	0.0214356	0.199363	0.0546335	5.56603	9.55005	11.7562	1.41359	59.9192	0.449781	12.0052	4.81172
36_ILV-6A-T2 9.0	9	0.0174287	0.0453589	0	2.9402	4.86652	11.3422	2.68471	48.4462	0.237592	27.8729	56.7122
		38.2904	20.3532	2.1199	1237.5	2011.88
Ilva	ILB-6A-T3		J = 0.00327710 ± 0.00000590
Incremental Heating		36Ar(a) [V]	37Ar(ca) [V]	38Ar(cl) [V]	39Ar(k) [V]	40Ar(r) [V]	Age	± 2σ	40Ar(r)	39Ar(k)	K/Ca	± 2σ
							(Ma)		(%)	(%)
6_ILV-6A-T3 35	3.5	1.09606	176.895	0.128215	21.7013	37.6556	10.2536	2.08029	10.4093	2.25448	0.0527519	0.0110592
7_ILV-6A-T3 40	4	0.866231	487.391	0.314289	18.1365	58.2769	18.9422	2.84228	18.5345	1.88415	0.0160009	0.00141846
9_ILV-6A-T3 45	4.5	0.369549	181.982	0.126269	9.16096	27.0017	17.383	4.48802	19.8116	0.951704	0.0216462	0.00506489
10_ILV-6A-T3 50	5	0.538648	313.836	0.219811	42.6467	78.331	10.852	1.08992	32.924	4.43043	0.058432	0.00923128
11_ILV-6A-T3 55	5.5	0.169139	215.956	0.14297	48.7474	91.9254	11.1406	0.831674	64.5642	5.06422	0.097063	0.0193546
13_ILV-6A-T3 60	6	0.261978	107.729	0	284.269	488.16	10.1479	0.137177	85.8939	29.5318	1.13466	0.432223
14_ILV-6A-T3 63	6.3	0.190791	76.5775	0	312.392	518.54	9.80999	0.118445	89.7212	32.4535	1.75415	0.843043
15_ILV-6A-T3 65	6.5	0.0945346	13.9956	0	137.769	236.743	10.1547	0.277418	88.9968	14.3124	4.2328	13.7717
18_ILV-6A-T3 67	6.7	0.050607	43.3463	0	70.2354	122.621	10.3165	2.0319	88.6913	7.29654	0.696743	4.5048
19_ILV-6A-T3 70	7	0.03807	-60.2756	0.0329587	11.8342	13.4772	6.73623	12.1631	54.2526	1.22941	-0.0844237	0.395362
20_ILV-6A-T3 75	7.5	0.00242898	20.9824	0.0193348	5.6925	11.1261	11.5456	25.1059	93.5043	0.591376	0.116659	1.56235
		3.67803	1578.42	0.983847	962.585	1683.86
Ilva	ILB-6B-T1		J = 0.00377940 ± 0.00000907
Incremental Heating		36Ar(a) [V]	37Ar(ca) [V]	38Ar(cl) [V]	39Ar(k) [V]	40Ar(r) [V]	Age	± 2σ	40Ar(r)	39Ar(k)	K/Ca	± 2σ
							(Ma)		(%)	(%)
5_ILV-6B-T1 3.5	3.5	6.3621	0.312126	0.640864	12.5208	17.5359	9.54656	13.1887	0.92408	1.79126	17.2492	5.47435
6_ILV-6B-T1 4.0	4	2.10381	0.469039	0.275163	27.6596	31.6726	7.80905	1.95237	4.84576	3.95706	25.3574	5.40192
7_ILV-6B-T1 4.3	4.3	0.996101	0.460707	0.155845	29.7542	41.983	9.61763	0.882389	12.472	4.25672	27.771	6.00633
9_ILV-6B-T1 4.6	4.6	0.106124	0.412617	0.0425654	30.8029	44.7183	9.89469	0.199025	58.5498	4.40676	32.1006	8.37764
10_ILV-6B-T1 4.9	4.9	0.0656139	0.569049	0.105468	47.5514	79.6459	11.4111	0.132074	80.0497	6.80285	35.9321	6.22847
11_ILV-6B-T1 5.2	5.2	0.0627566	1.4963	0.0626239	131.506	225.129	11.6623	0.0545217	91.909	18.8137	37.7917	3.11468
13_ILV-6B-T1 5.5	5.5	0.05822	2.24614	0.0595701	192.482	310.895	11.0052	0.0426011	94.2208	27.5371	36.8486	1.65847
14_ILV-6B-T1 5.8	5.8	0.0454791	1.58862	0.0245724	132.386	211.832	10.9028	0.0516839	93.5018	18.9396	35.8337	2.23769
15_ILV-6B-T1 6.1	6.1	0.0252319	0.843701	0.0259884	62.8462	101.73	11.0292	0.101206	92.6545	8.99098	32.0302	3.72486
17_ILV-6B-T1 6.4	6.4	0.024021	0.417148	0.0308212	20.1002	30.1166	10.2112	0.297848	80.5051	2.87559	20.7194	4.88379
18_ILV-6B-T1 6.7	6.7	0.0118683	0.135945	0	7.07163	9.93077	9.57218	0.816042	73.5265	1.01169	22.3679	16.422
19_ILV-6B-T1 7.0	7	0.00141988	0.0551076	0	4.31097	7.18834	11.3602	1.33806	93.9691	0.61674	33.6381	60.8771
		9.86274	9.0065	1.42348	698.992	1112.38
Ilva	ILB-6B-T2		J = 0.00381370 ± 0.00000915
Incremental Heating		36Ar(a) [V]	37Ar(ca) [V]	38Ar(cl) [V]	39Ar(k) [V]	40Ar(r) [V]	Age	± 2σ	40Ar(r)	39Ar(k)	K/Ca	± 2σ
							(Ma)		(%)	(%)
18_ILV-6B-T2 3.5	3.5	13.0935	0.612787	0.850459	17.2751	5.09142	2.0314	22.7984	0.131412	4.70577	12.1221	0.505476
20_ILV-6B-T2 4.0	4	14.4488	0.811526	0.630043	21.7686	-8.70204	-2.75894	19.9909	-0.204219	5.92983	11.5345	0.409105
21_ILV-6B-T2 4.5	4.5	6.17204	0.548665	0.263317	12.9219	17.2523	9.18413	14.3606	0.937007	3.51996	10.1272	0.418134
5_ILV-6B-T2 5.0	5	0.735758	0.553636	0.104774	10.3126	16.8632	11.242	2.17818	7.19483	2.80917	8.00962	1.14572
6_ILV-6B-T2 5.2	5.2	0.443797	0.347274	0.0661022	4.6478	8.14296	12.0423	3.57111	5.84437	1.26607	5.75497	1.26256
7_ILV-6B-T2 5.4	5.4	0.444841	0.368711	0.063545	5.69989	7.21081	8.7035	2.89948	5.19823	1.55266	6.64736	1.53075
9_ILV-6B-T2 5.8	5.8	0.592144	0.707199	0.0525629	16.5697	33.3432	13.8246	1.14537	15.9933	4.51362	10.0749	1.08182
10_ILV-6B-T2 6.1	6.1	0.394766	1.30275	0.0579233	55.366	109.068	13.5347	0.286737	48.2051	15.0818	18.2746	1.0723
11_ILV-6B-T2 6.5	6.5	0.32449	3.6167	0.0226923	156.805	330.499	14.4774	0.0987016	77.2365	42.7141	18.643	0.428929
13_ILV-6B-T2 6.7	6.7	0.408098	3.14876	0.0194766	29.1868	28.6029	6.74581	0.540264	19.1351	7.95056	3.9858	0.102282
14_ILV-6B-T2 7.0	7	0.591143	3.84983	0.047968	20.8931	9.6554	3.18424	0.95501	5.23213	5.69133	2.33362	0.0509809
15_ILV-6B-T2 7.5	7.5	0.334685	1.92004	0.0441028	8.87138	8.15855	6.33115	1.69515	7.61458	2.41658	1.98678	0.0808167
17_ILV-6B-T2 8.5	8.5	0.0166903	0.214607	0.0233286	4.78696	7.02239	10.0887	2.47725	58.5163	1.30398	9.59148	3.43117
18_ILV-6B-T2 10	10	0.0269241	0.276935	0.0249543	1.999	2.43872	8.39388	5.98352	23.4173	0.544531	3.10386	0.881852
		38.0277	18.2794	2.27125	367.104	574.647
Ilva	ILB-6B-T3		J = 0.00327710 ± 0.00000590
Incremental Heating		36Ar(a) [V]	37Ar(ca) [V]	38Ar(cl) [V]	39Ar(k) [V]	40Ar(r) [V]	Age	± 2σ	40Ar(r)	39Ar(k)	K/Ca	± 2σ
							(Ma)		(%)	(%)
22_ILV-6B-T3 35	3.5	10.0249	771.252	0.774762	13.862	110.915	46.8054	17.0254	3.60887	2.26699	0.00772854	0.000442858
23_ILV-6B-T3 37	3.7	8.28292	852.198	0.829931	11.0631	160.298	83.8889	17.7049	6.14637	1.80925	0.00558217	0.000262473
24_ILV-6B-T3 40	4	3.64342	648.966	0.564498	12.1333	70.3851	34.0542	8.14258	6.13575	1.98428	0.00803943	0.000568592
26_ILV-6B-T3 43	4.3	3.46791	622.745	0.511099	14.5448	72.2139	29.1856	6.43443	6.58212	2.37865	0.0100431	0.00074584
27_ILV-6B-T3 47	4.7	1.76342	548.961	0.49343	16.9932	59.0087	20.4619	3.42357	10.1693	2.77907	0.0133108	0.000890454
28_ILV-6B-T3 50	5	0.697853	488.048	0.337883	24.2773	77.7648	18.8833	1.81038	27.3612	3.9703	0.0213897	0.00232071
30_ILV-6B-T3 52	5.2	0.202137	152.335	0.125652	76.0693	186.286	14.4544	0.321229	75.4945	12.4404	0.214723	0.0527263
31_ILV-6B-T3 54	5.4	0.231734	57.5851	0	151.488	307.681	11.9963	0.203418	81.4777	24.7743	1.13119	1.12341
5_ILV-6B-T3 55	5.5	0.133627	-59.8649	0.0334156	122.336	232.831	11.2435	0.967608	85.1292	20.0068	-0.87872	3.45234
6_ILV-6B-T3 56	5.6	0.0896991	72.9821	0.00912417	97.5869	207.11	12.5334	1.21185	88.2966	15.9593	0.574968	1.85277
7_ILV-6B-T3 57	5.7	0.0529126	-50.9877	0.0229079	34.0489	73.1302	12.6834	3.48674	82.0804	5.56835	-0.287148	1.33078
9_ILV-6B-T3 60	6	0.0277666	-49.5282	0.0397179	9.15077	28.0494	18.0741	12.9115	77.1794	1.49652	-0.0794462	0.378355
10_ILV-6B-T3 65	6.5	0.00682533	14.428	0.00486069	7.60244	37.4416	28.9524	15.4364	94.7118	1.2433	0.226576	3.70022
11_ILV-6B-T3 70	7	-0.0148715	234.098	0.0556208	7.77049	31.9018	24.1672	4.14959	115.659	1.27078	0.0142731	0.00360851
13_ILV-6B-T3 80	8	0.00803459	4.70025	0	8.4129	24.5661	17.2221	14.0132	90.912	1.37584	0.76965	38.5309
14_ILV-6B-T3 85	8.5	-0.00380785	34.7981	0.00543167	3.28426	9.99759	17.95	36.7088	112.28	0.537108	0.0405836	0.28077
15_ILV-6B-T3 90	9	-0.0216111	80.0248	0.020453	0.848454	9.24553	63.4493	138.017	322.404	0.138756	0.00455903	0.013629
		28.5928	4422.74	3.82879	611.472	1698.83
Pradhani	PRA-1B-T1		J = 0.00327710 ± 0.00000590
Incremental Heating		36Ar(a) [V]	37Ar(ca) [V]	38Ar(cl) [V]	39Ar(k) [V]	40Ar(r) [V]	Age	± 2σ	40Ar(r)	39Ar(k)	K/Ca	± 2σ
							(Ma)		(%)	(%)
17_PRA-1B-T1 4.0	4	-0.00376107	-14.4906	0.000178478	-0.0456328	-0.0539684	6.99499	1164.83	4.62927	-0.00645804	0.00135412	0.00843746
18_PRA-1B-T1 4.0	4.01	0.0800199	1.50007	0.010972	5.51398	17.5839	18.7999	8.7647	42.5934	0.780349	1.5806	66.1072
19_PRA-1B-T1 4.5	4.5	0.146168	193.958	0.166197	50.6936	187.487	21.7854	1.04344	81.1032	7.17425	0.112386	0.0419859
20_PRA-1B-T1 4.7	4.7	0.100276	108.726	0.0573751	124.433	506.904	23.9812	0.423398	94.2654	17.61	0.492119	0.322196
22_PRA-1B-T1 4.9	4.9	0.0970904	18.9929	0	222.594	950.695	25.1345	0.255794	96.8573	31.5019	5.03953	20.9579
23_PRA-1B-T1 5.1	5.1	0.0865016	-17.2563	0	207.576	889.636	25.2213	0.264423	96.9939	29.3765	-5.17247	22.1125
24_PRA-1B-T1 5.3	5.3	0.0481145	-22.9486	0	77.3571	393.638	29.9065	0.689358	96.337	10.9477	-1.44948	4.81778
26_PRA-1B-T1 5.5	5.5	0.053545	-116.451	0	12.2808	113.448	53.9317	3.91323	87.6794	1.73799	-0.0453473	0.0241541
27_PRA-1B-T1 5.8	5.8	0.0264287	-3.00365	0.00998953	4.02121	164.927	228.049	17.1958	95.4573	0.569088	-0.575672	21.5556
28_PRA-1B-T1 6.0	6	0.0149878	-40.8732	0.0131602	2.18079	49.3964	129.481	24.5306	91.7357	0.308629	-0.0229426	0.0434502
		0.649372	108.155	0.257872	706.605	3273.66
Pradhani	PRA-1B-T2		J = 0.00378540 ± 0.00000908
Incremental Heating		36Ar(a) [V]	37Ar(ca) [V]	38Ar(cl) [V]	39Ar(k) [V]	40Ar(r) [V]	Age	± 2σ	40Ar(r)	39Ar(k)	K/Ca	± 2σ
							(Ma)		(%)	(%)
27_PRA-1B-T2 3.5	3.5	2.19968	0.0848426	0.22683	9.43901	30.2871	21.832	6.06062	4.45147	1.75631	47.8388	35.316
28_PRA-1B-T2 4.0	4	1.38013	0.0696582	0.130547	13.9225	22.8475	11.1986	2.59693	5.30338	2.59056	85.9438	73.3629
30_PRA-1B-T2 4.3	4.5	0.502235	0.12996	0.0588187	15.7389	39.5596	17.1241	1.05056	21.0286	2.92852	52.0752	22.2502
31_PRA-1B-T2 4.6	4.6	0.0509873	0.114477	0.052089	12.4709	43.0877	23.4973	0.289623	73.9382	2.32046	46.8436	25.465
32_PRA-1B-T2 4.9	4.9	0.0211709	0.128931	0.0527974	17.2727	61.1074	24.0563	0.196986	90.4882	3.21391	57.6064	26.3377
34_PRA-1B-T2 5.2	5.2	0.0167779	0.0426549	0.0239688	19.0672	71.8847	25.6245	0.180888	93.3236	3.54782	192.214	263.76
35_PRA-1B-T2 5.5	5.5	0.0217708	0.0735115	0.0238444	34.9176	143.726	27.9586	0.129684	95.5005	6.4971	204.248	154.276
36_PRA-1B-T2 5.8	5.8	0.0304171	0.230396	0.0104727	50.0781	219.25	29.7238	0.108153	95.8581	9.31802	93.4636	23.1551
5_PRA-1B-T2 6.1	6.1	0.0310264	0.241893	0.0326057	51.1549	229.985	30.5162	0.251373	95.9673	9.51837	90.9354	38.4747
6_PRA-1B-T2 6.4	6.4	0.102529	0.393613	0.0247393	154.433	674.716	29.662	0.222117	95.4998	28.7353	168.71	40.0419
7_PRA-1B-T2 6.7	6.7	0.0565708	0.168619	0.0642946	117.695	593.475	34.1917	0.255394	97.0789	21.8994	300.136	172.752
2_PRA-1B-T2 7.0	7	0.0441248	0.0708544	0.0423893	31.6299	763.123	158.04	1.23584	98.2813	5.88535	191.955	255.191
3_PRA-1B-T2 7.3	7.3	0.00954995	-0.0569053	0.0393618	5.70304	250.166	277.794	4.84727	98.8629	1.06116	-43.0945	71.1403
4_PRA-1B-T2 7.6	7.6	0.00587364	-0.0143051	0.0461275	3.91109	66.8117	113.309	2.9942	97.4141	0.727734	-117.564	777.776
		4.47285	1.6782	0.828886	537.434	3210.03
Pradhani	PRA-1B-T3		J = 0.00383290 ± 0.00000690
Incremental Heating		36Ar(a) [V]	37Ar(ca) [V]	38Ar(cl) [V]	39Ar(k) [V]	40Ar(r) [V]	Age	± 2σ	40Ar(r)	39Ar(k)	K/Ca	± 2σ
							(Ma)		(%)	(%)
26_PRA-1B-T3	3.7	0.373745	0.0316077	0.0466343	1.08183	3.24338	20.6614	45.1665	2.82483	0.738257	14.7175	55.1121
27_PRA-1B-T3 CRYPTO 4	4	0.780537	0.201761	0.24574	3.09838	0	0	0	0	2.11439	6.6034	3.60023
29_PRA-1B-T3 CRYPTO 4.3	4.3	0.394476	0.12862	0.140571	7.91334	31.0242	26.9712	6.1981	20.8423	5.4002	26.4558	22.8289
30_PRA-1B-T3 CRYPTO 4.6	4.6	0.0709506	0.0463956	0.122786	7.3904	32.5522	30.2743	6.40896	60.5031	5.04334	68.4951	160.689
5_PRA-1B-T3 CRYPTO 5	5	0.0218974	0.040756	0.0276565	10.8456	56.8212	35.9529	1.4178	89.5348	7.40125	114.428	130.751
6_PRA-1B-T3 CRYPTO 5.4	5.4	0.017253	0.0449764	0.0576152	18.4184	112.39	41.807	0.854449	95.4735	12.569	176.09	172.595
7_PRA-1B-T3 CRYPTO 5.7	5.7	0.0179865	0.0421035	0.017966	33.2062	217.628	44.8641	0.481576	97.4517	22.6605	339.133	335.134
9_PRA-1B-T3 CRYPTO 5.9	5.9	0.00819947	0.0756916	0.0382402	25.5345	172.395	46.1996	0.613849	98.4608	17.4252	145.06	101.403
10_PRA-1B-T3 CRYPTO 6.1	6.1	0.00790162	0.0162528	0	14.1843	94.4985	45.5967	1.09153	97.4266	9.67959	375.272	958.723
14_PRA-1B-T3 CRYPTO 6.7	6.4	0.00363786	0.048609	0.0860967	5.85676	33.8589	39.6324	2.65031	96.7354	3.99676	51.8096	37.8759
11_PRA-1B-T3 CRYPTO 6.4	6.4	0.00515611	0	0	10.7967	69.0805	43.8121	1.42478	97.6759	7.36788	-5.47754	11.8099
15_PRA-1B-T3 CRYPTO 10	10	0.0129189	0.0429142	0.271813	8.21142	36.2134	30.3115	1.87119	90.197	5.60362	82.2784	100.77
		1.71466	0.719687	1.05512	146.538	859.704
Pradhani	PRA-2A-T1		J = 0.00316410 ± 0.00000791
Incremental Heating		36Ar(a) [V]	37Ar(ca) [V]	38Ar(cl) [V]	39Ar(k) [V]	40Ar(r) [V]	Age	± 2σ	40Ar(r)	39Ar(k)	K/Ca	± 2σ
							(Ma)		(%)	(%)
4_PRA2AT1-A6-35	3.5	0.456302	0.239833	0.0525836	8.9596	29.1488	18.5196	3.82979	17.7658	0.491667	16.0638	8.95517
5_PRA2AT1-A6-45	4.5	0.674908	0.402668	0.07977	27.8308	91.8284	18.781	1.31432	31.4984	1.52724	29.7199	10.4343
7_PRA2AT1-A6-55	5.5	0.217995	0.239197	0.00782821	26.0746	89.8268	19.6045	1.26124	58.1414	1.43087	46.874	25.085
8_PRA2AT1-A6-65	6.5	0.180944	0.451483	0.0578276	64.8245	235.761	20.6905	0.511514	81.3368	3.55731	61.74	23.0437
10_PRA2AT1-A6-70	7	0.111744	0.400261	0.0383364	82.9745	324.096	22.2118	0.398384	90.5498	4.55331	89.1395	39.5176
11_PRA2AT1-A6-75	7.5	0.139373	0.589797	0.00266766	154.381	641.601	23.6241	0.225932	93.7627	8.47183	112.554	29.508
13_PRA2AT1-A6-80	8	0.170814	1.38196	0	364.836	1566.39	24.4003	0.123485	96.6668	20.0207	113.52	15.2716
14_PRA2AT1-A6-85	8.5	0.124562	1.7173	0	468.451	2025.23	24.5687	0.11122	97.9992	25.7067	117.297	8.42661
16_PRA2AT1-A6-90	9	0.0432194	0.849357	0	229.39	999.798	24.7676	0.165749	98.5224	12.588	116.132	18.2562
17_PRA2AT1-A6-100	10	0.00719679	0.319777	0.0112695	50.3386	223.58	25.2361	0.64464	98.8442	2.76238	67.6897	27.1232
19_PRA2AT1-A6-110	11	0.057117	0.850842	0	243.454	1080.73	25.2228	0.161296	98.2511	13.3598	123.037	17.8253
22_PRA2AT1-A6-120	12	0.0248335	0.734318	0	97.1047	471.653	27.5798	0.345981	98.2749	5.32872	56.8623	10.9498
23_PRA2AT1-A6-130	13	0.00462173	0.193154	0	3.67202	17.5162	27.0897	8.74638	92.5926	0.201505	8.17465	6.03146
		2.21363	8.36994	0.250283	1822.29	7797.16
Pradhani	PRA-2A-T3		J = 0.00315060 ± 0.00000788
Incremental Heating		36Ar(a) [V]	37Ar(ca) [V]	38Ar(cl) [V]	39Ar(k) [V]	40Ar(r) [V]	Age	± 2σ	40Ar(r)	39Ar(k)	K/Ca	± 2σ
							(Ma)		(%)	(%)
2_PRA2AT3-A1-30	3	-0.012287	-0.115882	0	-0.0739193	1.52547	-121.571	855.078	-71.1458	-0.00496108	0.274289	0.859925
3_PRA2AT3-A1-35	3.5	0.098724	0.0194964	0.0168205	3.88019	16.4948	24.0586	13.6283	35.8494	0.260418	85.5788	706.725
4_PRA2AT3-A1-40	4	0.315674	0.0507463	0.0502707	13.9222	49.6734	20.2141	3.85511	34.479	0.934388	117.97	294.899
6_PRA2AT3-A1-45	4.5	0.297051	0.338921	0.0625138	18.2123	55.3538	17.2338	2.95497	38.379	1.22231	23.1065	11.2082
7_PRA2AT3-A1-50	5	0.196872	0.397575	0.108144	22.5733	70.6739	17.7501	2.36884	54.4993	1.515	24.4143	7.7989
11_PRA2AT3-A1-55	5.5	0.0799396	0.138047	0.0162474	18.0848	64.773	20.2913	2.82463	72.9276	1.21376	56.3317	54.316
12_PRA2AT3-A1-65	6.5	0.0864887	0.144295	0	28.8284	103.36	20.3124	1.77327	79.8364	1.93481	85.909	81.5755
14_PRA2AT3-A1-75	7.5	0.0912001	0.281737	0.0212758	48.7001	185.8	21.6066	1.05295	87.024	3.2685	74.3283	44.646
15_PRA2AT3-A1-80	8	0.105799	0.411263	0	70.7415	282.159	22.5826	0.725181	89.7349	4.74781	73.9645	23.9112
17_PRA2AT3-A1-85	8.5	0.0759497	0.31123	0	73.6155	303.332	23.3246	0.696491	92.8405	4.9407	101.708	41.5695
18_PRA2AT3-A1-90	9	0.0842096	0.507936	0	131.729	554.374	23.8191	0.394156	95.4508	8.84099	111.517	27.3178
20_PRA2AT3-A1-95	9.5	0.0948053	0.70992	0	190.749	797.066	23.6514	0.278921	96.3544	12.8021	115.537	21.2183
21_PRA2AT3-A1-100	10	0.0910623	0.890428	0	271.183	1131.18	23.6101	0.203392	97.4316	18.2004	130.958	23.6369
23_PRA2AT3-A1-105	10.5	0.0592719	0.669546	0	229.535	961.682	23.7137	0.235501	97.9704	15.4052	147.413	26.1042
24_PRA2AT3-A1-110	11	0.029807	0.503367	0	128.261	542.608	23.9431	0.40535	98.165	8.60823	109.567	27.6896
26_PRA2AT3-A1-120	12	0.0363297	0.369697	0	143.355	614.426	24.2555	0.36424	98.0473	9.62122	166.738	57.7417
27_PRA2AT3-A1-130	13	0.0228022	0.0103225	0	67.9414	298.69	24.875	0.754134	97.561	4.55988	2830.2	42158.8
29_PRA2AT3-A1-140	14	0.0252927	0.0302808	0	28.7444	155.595	30.5798	1.77531	95.2083	1.92918	408.182	2539.72
		1.77899	5.66893	0.275272	1489.98	6188.77
Pradhani	PRA-2A-T5		J = 0.00315060 ± 0.00000788
Incremental Heating		36Ar(a) [V]	37Ar(ca) [V]	38Ar(cl) [V]	39Ar(k) [V]	40Ar(r) [V]	Age	± 2σ	40Ar(r)	39Ar(k)	K/Ca	± 2σ
							(Ma)		(%)	(%)
5_PRA-2A-T5 CRYPTO 3.7	3.7	0.6244	0.00599391	0.314883	4.43713	13.0481	20.268	10.2047	6.54123	0.370316	318.317	4557.41
6_PRA-2A-T5 CRYPTO 4	4	0.323215	0.0798815	0.15053	7.51717	18.1213	16.6318	5.74523	15.8025	0.627371	40.4647	44.2192
7_PRA-2A-T5 CRYPTO 4.3	4.3	0.466845	0.0966355	0.0999031	11.5328	27.8648	16.6694	3.81894	16.6526	0.962507	51.3175	46.3512
9_PRA-2A-T5 CRYPTO 4.5	4.5	0.105534	0.0998628	0.129662	17.1023	43.427	17.5147	2.47729	57.8296	1.42733	73.6409	68.9658
10_PRA-2A-T5 CRYPTO 4.8	4.8	0.0891139	0.134972	0.109607	24.2237	60.3429	17.184	1.75094	69.218	2.02167	77.1731	45.5914
11_PRA-2A-T5 CRYPTO 5.1	5.1	0.0825651	0.144847	0.139375	32.1256	82.9471	17.8079	1.32212	76.8712	2.68116	95.3695	54.379
13_PRA-2A-T5 CRYPTO 5.4	5.4	0.0524703	0	0.0583771	37.9041	108.561	19.7432	1.11628	87.1341	3.16341	-124.768	1723.99
14_PRA-2A-T5 CRYPTO 5.7	5.7	0.0623984	0.156657	0.0128131	79.1265	239.193	20.8317	0.536671	92.5005	6.60378	217.19	113.183
15_PRA-2A-T5 CRYPTO 5.9	5.9	0.0240378	0.0591674	0	94.791	297.777	21.6434	0.448663	97.3539	7.91111	688.896	1022.18
17_PRA-2A-T5 CRYPTO 6.1	6.1	0.0303665	0.0661079	0	168.54	529.165	21.6316	0.257176	98.0185	14.0661	1096.28	1370.43
18_PRA-2A-T5 CRYPTO 6.3	6.3	0.0282919	0.0312549	0	233.314	733.247	21.6525	0.189543	98.5609	19.472	3209.9	9553.87
19_PRA-2A-T5 CRYPTO 6.4	6.4	0.0164259	0.0690037	0.00331832	155.087	485.723	21.5786	0.27846	98.6983	12.9433	966.431	1221.88
21_PRA-2A-T5 CRYPTO 6.6	6.6	0.0216541	0.0491352	0	169.905	527.03	21.3728	0.254568	98.4845	14.18	1486.9	2418.75
22_PRA-2A-T5 CRYPTO 6.8	6.8	0.0204857	0.0590117	0.0296861	84.8954	261.312	21.2094	0.500116	97.4137	7.08524	618.607	856.169
23_PRA-2A-T5 CRYPTO 7.2	7.2	0.0206894	0.0591346	0.0361639	35.1476	107.098	20.9974	1.2026	94.2645	2.93336	255.577	359.986
25_PRA-2A-T5 CRYPTO 7.7	7.7	0.0127297	0.0095969	0	13.6936	41.933	21.101	3.08394	91.426	1.14285	613.559	5053.68
26_PRA-2A-T5 CRYPTO 9	9	0.00725871	0	0.0687728	8.91668	30.1036	23.25	4.73199	93.0366	0.744172	8.55558	25.5402
27_PRA-2A-T5 CRYPTO 12	12	0.00562747	0	0	19.941	65.7633	22.7147	2.11717	97.2307	1.66425	-14.0658	27.4434
		1.99411	1.12126	1.15309	1198.2	3672.66
Pradhani	PRA-2B-T1		J = 0.00327710 ± 0.00000590
Incremental Heating		36Ar(a) [V]	37Ar(ca) [V]	38Ar(cl) [V]	39Ar(k) [V]	40Ar(r) [V]	Age	± 2σ	40Ar(r)	39Ar(k)	K/Ca	± 2σ
							(Ma)		(%)	(%)
8_PRA-2B-T1 35	3.5	1.38025	129.626	0.171292	13.5857	34.02	14.7789	4.48707	7.69655	1.00955	0.0450669	0.0295995
9_PRA-2B-T1 37	3.7	1.47449	226.173	0.21442	20.8402	52.7399	14.9351	3.18353	10.7929	1.54864	0.0396214	0.0164763
10_PRA-2B-T1 38	3.8	1.51284	206.158	0.185461	20.0559	58.3134	17.1487	3.20827	11.5346	1.49035	0.0418321	0.0177943
12_PRA-2B-T1 39	3.9	1.10811	224.024	0.159745	23.541	77.8891	19.5017	2.51602	19.2051	1.74933	0.0451854	0.0173338
13_PRA-2B-T1 40	4	0.927132	147.692	0.165241	25.2671	70.9244	16.5583	2.39829	20.5496	1.8776	0.073564	0.0480694
14_PRA-2B-T1 41	4.1	0.525518	112.834	0.0837188	20.4841	59.7476	17.2028	2.57309	27.759	1.52218	0.0780628	0.058132
16_PRA-2B-T1 42	4.2	0.457593	119.474	0.043064	29.1546	102.134	20.6418	1.77305	42.9794	2.16648	0.104931	0.072782
17_PRA-2B-T1 43	4.3	0.196936	92.3789	0.0563646	23.5185	86.995	21.7886	2.25005	59.8243	1.74766	0.109473	0.105154
18_PRA-2B-T1 44	4.4	0.114002	16.3514	0.0803821	19.6174	67.0828	20.1517	2.53809	66.4446	1.45777	0.515887	2.58703
20_PRA-2B-T1 45	4.5	0.0824408	41.3562	0.0336628	21.7789	74.8504	20.2529	2.27531	75.285	1.61839	0.226446	0.445332
21_PRA-2B-T1 47	4.7	0.110646	17.9661	0.0524093	31.3549	103.47	19.4508	1.62507	75.819	2.32998	0.750445	3.53557
22_PRA-2B-T1 49	4.9	0.0696629	122.034	0.0435301	45.2854	174.716	22.7199	1.24726	89.2591	3.36516	0.159568	0.126781
24_PRA-2B-T1 50	5	0.0835819	10.625	0.0110372	55.7387	228.703	24.1533	0.930164	90.0613	4.14195	2.25578	18.4831
25_PRA-2B-T1 51	5.1	0.125672	-27.989	0.00358503	86.4274	376.219	25.6138	0.688355	90.8319	6.42243	-1.3278	4.9547
26_PRA-2B-T1 52	5.2	0.111825	55.0503	0	109.79	514.122	27.5396	0.47334	93.7785	8.15847	0.857571	1.33703
5_PRA-2B-T1 53	5.3	0.0639039	102.458	0.0037691	92.0402	439.785	28.0963	0.570139	95.6969	6.83951	0.386278	0.385563
6_PRA-2B-T1 54	5.4	0.0833337	0.841922	0.00519296	88.859	417.969	27.6619	0.422826	94.2528	6.60312	45.3835	3864.37
7_PRA-2B-T1 55	5.5	0.131622	-83.9578	0	129.211	602.118	27.4064	0.265471	93.7493	9.60166	-0.661768	0.491403
9_PRA-2B-T1 56	5.6	0.0830675	43.7264	0.0221563	125.135	599.731	28.1807	0.292083	95.8818	9.29882	1.23057	1.90425
10_PRA-2B-T1 57	5.7	0.071577	-16.7237	0	104.722	498.191	27.9743	0.240363	95.7403	7.78189	-2.69261	7.09059
11_PRA-2B-T1 58	5.8	0.0829392	-98.8576	0	86.6254	410.512	27.8673	0.37265	94.1844	6.43714	-0.376794	0.228367
13_PRA-2B-T1 59	5.9	0.075805	-153.424	0.00366516	56.0408	262.798	27.5783	0.834336	91.9706	4.16439	-0.157065	0.0925854
14_PRA-2B-T1 60	6	0.026598	-14.3314	0	33.8893	171.118	29.6776	1.08188	95.4335	2.51831	-1.01681	5.08169
15_PRA-2B-T1 61	6.1	0.0251747	-45.51	0.0237754	13.3174	68.5371	30.2437	1.96291	90.0557	0.989616	-0.125829	0.137777
18_PRA-2B-T1 62	6.2	0.0159159	-17.1494	0.0455372	13.7337	73.3618	31.3814	2.36873	93.8154	1.02055	-0.344356	1.30355
19_PRA-2B-T1 64	6.4	0.0270932	-55.5556	0.0138323	11.295	56.0041	29.147	3.3029	87.3432	0.839332	-0.0874232	0.116911
20_PRA-2B-T1 66	6.6	0.00605785	44.934	0.0539625	11.1418	60.6404	31.9687	3.12684	96.965	0.82795	0.106623	0.164551
22_PRA-2B-T1 70	7	0.0156867	9.89757	0.037197	8.31287	39.7872	28.1432	4.21748	89.4031	0.61773	0.361153	2.55585
23_PRA-2B-T1 75	7.5	0.0300662	-3.69106	0	15.1285	70.5118	27.4117	2.19338	88.6462	1.1242	-1.76243	31.6113
24_PRA-2B-T1 80	8	0.0166483	-9.65915	0	9.82149	50.4871	30.2089	3.91774	90.9647	0.729835	-0.437227	3.48604
		9.0362	1196.75	1.513	1345.71	5903.48
Pradhani	PRA-2B-T2		J = 0.00315330 ± 0.00000788
Incremental Heating		36Ar(a) [V]	37Ar(ca) [V]	38Ar(cl) [V]	39Ar(k) [V]	40Ar(r) [V]	Age	± 2σ	40Ar(r)	39Ar(k)	K/Ca	± 2σ
							(Ma)		(%)	(%)
4_PRA2BT2-A2-31	3.1	0.0258214	0.160335	0.000645717	0.0627466	3.30793	278.09	403.759	30.0208	0.00225542	0.168279	0.215814
7_PRA2BT2-A2-40	4	0.251196	-0.0310357	0.00566889	11.549	39.2657	19.2838	2.18886	34.3278	0.415128	-160.012	890.311
8_PRA2BT2-A2-50	5	0.327878	0.320936	0.0164752	22.9941	72.7491	17.9512	1.11714	42.5742	0.826522	30.8083	15.2598
9_PRA2BT2-A2-55	5.5	0.166985	0.309522	0.0500992	25.6722	84.0588	18.575	0.960992	62.6514	0.922783	35.6647	16.176
11_PRA2BT2-A2-60	6	0.107292	0.26897	0.0281177	29.3505	99.7844	19.2828	0.832024	75.5334	1.055	46.9225	26.5587
12_PRA2BT2-A2-65	6.5	0.0875232	0.172877	0.0298427	33.1348	115.168	19.7114	0.735253	81.3198	1.19103	82.4166	77.6531
14_PRA2BT2-A2-70	7	0.0699393	0.230515	0	36.1703	128.239	20.1044	0.677876	85.7939	1.30014	67.4717	40.8932
15_PRA2BT2-A2-75	7.5	0.0620785	0.175044	0.00200332	46.2986	166.273	20.3633	0.529509	89.752	1.6642	113.734	88.4837
17_PRA2BT2-A2-80	8	0.0951785	0.214575	0	85.4086	314.091	20.8491	0.29342	91.4813	3.07	171.156	129.318
18_PRA2BT2-A2-85	8.5	0.0993973	0.284517	0	103.488	391.452	21.4412	0.248288	92.7315	3.71988	156.405	83.7078
20_PRA2BT2-A2-90	9	0.102244	0.316824	0	166.451	645.858	21.9911	0.169459	95.2592	5.98306	225.91	110.942
21_PRA2BT2-A2-95	9.5	0.0919207	0.553289	0	231.498	908.422	22.2386	0.133752	96.8351	8.32117	179.913	47.7904
23_PRA2BT2-A2-100	10	0.100167	0.838477	0	370.908	1459.17	22.2947	0.108162	97.7554	13.3322	190.214	35.4914
24_PRA2BT2-A2-105	10.5	0.0767705	0.821126	0	365.162	1441.86	22.3762	0.108908	98.1978	13.1257	191.225	32.6421
25_PRA2BT2-A2-110	11	0.066337	0.78389	0	340.753	1353.19	22.5038	0.111723	98.3209	12.2483	186.919	39.0473
27_PRA2BT2-A2-120	12	0.0596337	0.694079	0	363.126	1455.63	22.7145	0.109755	98.5561	13.0525	224.966	51.5676
28_PRA2BT2-A2-125	12.5	0.0465615	0.553211	0	279.784	1134.81	22.9815	0.123431	98.5571	10.0568	217.47	66.8915
4_PRA2BT2-A2-132	13.2	0.0446859	0.450761	0	173.88	722.818	23.5498	0.162405	97.9632	6.25011	165.872	68.0162
5_PRA2BT2-A2-140	14	0.0351516	0.177686	0	75.2513	331.123	24.9184	0.331497	96.721	2.7049	182.108	162.891
7_PRA2BT2-A2-150	15	0.0198753	-0.0997593	0.0396487	21.0935	115.751	31.0232	1.14386	94.9634	0.758204	-90.921	151.64
		1.93664	7.19584	0.172501	2782.04	10983
Pradhani	PRA-2B-T4		J = 0.00383290 ± 0.00000920
Incremental Heating		36Ar(a) [V]	37Ar(ca) [V]	38Ar(cl) [V]	39Ar(k) [V]	40Ar(r) [V]	Age	± 2σ	40Ar(r)	39Ar(k)	K/Ca	± 2σ
							(Ma)		(%)	(%)
5_PRA-2B-T4 3.5	3.5	0.907854	0.0138772	0.646277	10.3858	15.7143	10.4568	2.62584	5.47902	0.393466	321.816	743.28
6_PRA-2B-T4 4.0	4	1.20366	0.00843085	0.270295	24.4841	51.2126	14.4398	1.48204	12.4683	0.927575	1248.77	6352.17
7_PRA-2B-T4 4.5	4.5	0.689351	-0.00506375	0.100527	39.0403	114.033	20.1326	0.572297	35.6149	1.47903	-3315.19	26889.6
9_PRA-2B-T4 4.8	4.8	0.230346	0.0275962	0.0709779	44.1701	136.641	21.3154	0.297636	66.3863	1.67338	688.253	1054.78
10_PRA-2B-T4 5.1	5.1	0.107378	0.0243757	0	37.3379	112.842	20.8267	0.310773	77.6848	1.41454	658.659	1387.55
11_PRA-2B-T4 5.4	5.4	0.099998	0.0372477	0	48.238	147.71	21.1003	0.237033	82.9707	1.82749	556.876	557.753
14_PRA-2B-T4 5.7	5.7	0.116893	-0.0370767	0.100649	94.3451	301.31	22.0015	0.0854419	89.3785	3.57425	-1094.17	2614.8
15_PRA-2B-T4 6.0	6	0.123105	0.065469	0.0214925	141.391	469.135	22.8523	0.078325	92.4856	5.35658	928.657	1184.36
16_PRA-2B-T4 6.3	6.3	0.109327	0.111811	0.0337777	216.824	739.041	23.4715	0.0744145	95.5109	8.21435	833.861	628.501
18_PRA-2B-T4 6.6	6.6	0.126439	0.23899	0.0421936	401.526	1359.99	23.325	0.0722487	97.0297	15.2117	722.44	257.106
19_PRA-2B-T4 6.8	6.8	0.126981	0.286592	0	571.326	1932.84	23.2977	0.0701375	97.8019	21.6446	857.212	256.127
20_PRA-2B-T4 7.0	7	0.0765541	0.154187	0.0356755	443.297	1511	23.472	0.0708182	98.2351	16.7942	1236.28	688.992
22_PRA-2B-T4 7.2	7.2	0.0311794	0.143893	0.0149594	179.895	619.358	23.7069	0.0757498	98.2471	6.81529	537.586	358.813
23_PRA-2B-T4 7.5	7.5	0.0731734	0.147375	0	187.371	649.589	23.8709	0.0714007	96.486	7.09852	546.696	312.133
24_PRA-2B-T4 7.8	7.8	0.0309577	0.056305	0.0137219	95.487	338.496	24.4049	0.087248	97.0842	3.61751	729.232	1082.86
26_PRA-2B-T4 8.3	8.3	0.0226909	0.0188197	0.0420658	33.9601	136.165	27.5794	0.1524	95.0426	1.28657	775.935	3481.29
27_PRA-2B-T4 8.8	8.8	0.016966	0.0514502	0	10.9358	60.6332	38.0268	0.388733	92.1428	0.414299	91.3966	154.139
28_PRA-2B-T4 9.5	9.5	0.0226421	0.00417596	0.0196081	13.9115	65.0882	32.1414	0.308657	90.4233	0.527035	1432.47	29220.8
30_PRA-2B-T4 10	10	0.0894668	0.0478553	0	9.08365	38.3482	29.0266	0.504681	58.8686	0.344132	81.6204	141.818
31_PRA-2B-T4 11	11	0.0591523	0.035822	0	13.4606	52.4366	26.8008	0.331027	74.6705	0.509954	161.579	384.21
32_PRA-2B-T4 15	15	0.047942	0.0356684	0	23.1086	84.159	25.0678	0.201229	85.273	0.875465	278.586	649.7
		4.31206	1.4678	1.41222	2639.58	8935.74
Pradhani	PRA-3B-T1		J = 0.00378140 ± 0.00000908
Incremental Heating		36Ar(a) [V]	37Ar(ca) [V]	38Ar(cl) [V]	39Ar(k) [V]	40Ar(r) [V]	Age	± 2σ	40Ar(r)	39Ar(k)	K/Ca	± 2σ
							(Ma)		(%)	(%)
6_PRA-3B-T1 3.5	3.5	2.25699	0.26387	0.211006	15.3238	35.3368	15.7001	4.1867	5.03067	1.05334	24.9715	6.6326
7_PRA-3B-T1 4.0	4	1.05202	0.286109	0.152895	21.8501	75.9661	23.6187	1.41717	19.627	1.50195	32.839	7.98156
9_PRA-3B-T1 4.5	4.5	0.356741	0.280746	0.0363403	17.1758	66.5971	26.321	0.696839	38.6786	1.18064	26.3069	6.31015
10_PRA-3B-T1 5.0	5	0.626961	0.281237	0	22.0938	83.7151	25.7257	0.876556	31.0982	1.51871	33.7806	8.35062
11_PRA-3B-T1 5.3	5.3	0.568314	0.446398	0.0380031	30.9751	119.636	26.2194	0.573556	41.5586	2.1292	29.8373	5.21875
13_PRA-3B-T1 5.6	5.6	0.276668	0.459269	0	30.9497	128.361	28.1398	0.345917	61.0034	2.12745	28.9773	4.44941
14_PRA-3B-T1 5.9	5.9	0.125087	0.477936	0.032561	30.957	141.874	31.0695	0.257098	79.1984	2.12795	27.852	4.28593
15_PRA-3B-T1 6.2	6.2	0.180696	0.801465	0	56.2459	312.056	37.5451	0.195372	85.262	3.86629	30.1769	2.63945
17_PRA-3B-T1 6.5	6.5	0.235269	1.42776	0	102.357	521.726	34.5222	0.148866	88.0937	7.03595	30.827	1.50068
18_PRA-3B-T1 6.8	6.8	0.316968	3.11495	0	236.96	1144.8	32.7374	0.112105	92.266	16.2884	32.7109	0.834831
22_PRA-3B-T1 7.1	7.1	0.335048	4.56757	0	352.808	1709.29	32.8289	0.104047	94.3465	24.2517	33.214	0.689091
23_PRA-3B-T1 7.4	7.4	0.214273	2.56897	0	201.821	979.226	32.8768	0.107693	93.7508	13.873	33.7813	1.2106
24_PRA-3B-T1 7.7	7.7	0.176279	2.61968	0.0778451	190.469	1018.94	36.2157	0.117343	94.9728	13.0927	31.2641	1.0041
26_PRA-3B-T1 8.0	8	0.118608	1.10625	0.0265839	68.7592	549.73	53.8596	0.197477	93.8995	4.72644	26.7266	2.00789
27_PRA-3B-T1 8.3	8.3	0.0482803	0.62649	0.124413	36.3035	326.343	60.447	0.27059	95.7125	2.49547	24.9174	3.29619
28_PRA-3B-T1 8.6	8.6	0.049421	0.527215	0.00637513	27.4084	264.836	64.894	0.330982	94.6839	1.88403	22.3545	3.87666
5_PRA-3B-T1 8.9	8.9	0.075908	0.07689	0.12411	6.6841	237.975	228.402	2.01072	91.3635	0.459458	37.3802	18.4896
6_PRA-3B-T1 9.2	9.2	0.0119245	0.0618386	0.0905914	4.47567	68.5157	101.761	1.15896	95.0514	0.307653	31.1219	23.3583
	10	0.0877832	-0.0630392	0.134272	1.15976	15.3249	88.1708	3.71899	37.1277	0.0797209	-7.91092	5.64186
		7.11324	19.9316	1.055	1454.78	7800.25
Pradhani	PRA-3B-T2		J = 0.00377940 ± 0.00000907
Incremental Heating		36Ar(a) [V]	37Ar(ca) [V]	38Ar(cl) [V]	39Ar(k) [V]	40Ar(r) [V]	Age	± 2σ	40Ar(r)	39Ar(k)	K/Ca	± 2σ
							(Ma)		(%)	(%)
9_PRA-3B-T2 3.5	3.5	0.743661	0.0183249	0.334422	5.95518	10.1239	11.5813	3.56525	4.40295	0.63066	139.74	578.451
10_PRA-3B-T2 4.0	4	0.667581	0.171022	0.316373	11.5168	37.7311	22.2531	1.77553	16.0481	1.21964	28.9566	15.338
11_PRA-3B-T2 4.3	4.3	0.220669	0.0425858	0.241994	10.0099	37.7094	25.565	1.06942	36.6061	1.06006	101.072	204.35
13_PRA-3B-T2 4.6	4.6	0.262605	0.138893	0.209072	10.4544	34.1483	22.187	1.15708	30.5306	1.10714	32.366	16.8576
14_PRA-3B-T2 4.9	4.9	0.564845	0.258767	0.190725	18.2881	63.4445	23.5554	0.930821	27.5207	1.93673	30.3899	8.95561
15_PRA-3B-T2 5.2	5.2	0.446477	0.210289	0.208193	20.9862	80.93	26.1654	0.704493	37.9833	2.22246	42.9126	16.7889
17_PRA-3B-T2 5.5	5.5	0.093262	0.107559	0.140753	6.64505	25.97	26.5145	1.42395	48.4575	0.703718	26.5656	18.1563
18_PRA-3B-T2 5.8	5.8	0.191268	0.270288	0.138948	23.6155	105.438	30.2594	0.456143	65.0104	2.50091	37.5698	10.3464
19_PRA-3B-T2 6.1	6.1	0.0926055	0.284465	0.206146	22.5936	116.119	34.788	0.42688	80.8049	2.39269	34.1528	8.91913
21_PRA-3B-T2 6.4	6.4	0.193685	0.777126	0.169094	54.5041	345.971	42.8697	0.230651	85.693	5.77205	30.1583	2.92834
22_PRA-3B-T2 6.7	6.7	0.225421	2.31878	0.095625	174.807	976.654	37.7863	0.118189	93.4633	18.5123	32.4167	1.09782
23_PRA-3B-T2 7.0	7	0.223484	2.74163	0.0482518	205.522	1126.43	37.0752	0.111705	94.3045	21.765	32.2343	0.95118
25_PRA-3B-T2 7.3	7.3	0.161979	2.31254	0.0545119	171.908	956.939	37.6493	0.116971	95.0788	18.2053	31.965	1.04437
26_PRA-3B-T2 7.6	7.6	0.0789264	1.31705	0.0327069	92.2246	624.207	45.6754	0.16352	96.2653	9.7667	30.1103	1.73253
27_PRA-3B-T2 7.9	7.9	0.0749009	1.03899	0.064282	65.7873	672.598	68.5571	0.230324	96.7254	6.96695	27.2268	1.96904
29_PRA-3B-T2 8.2	8.2	0.0525707	0.604351	0	34.6298	1209.46	224.201	0.66779	98.7048	3.66734	24.6394	2.98681
30_PRA-3B-T2 8.7	8.7	0.0161004	0.112125	0	8.39597	281.736	215.916	1.48042	98.3114	0.889143	32.1986	20.8921
31_PRA-3B-T2 9.5	9.5	0.0200232	0.0891283	0	6.43308	91.9188	95.107	1.48823	93.8924	0.68127	31.0364	26.1482
		4.33006	12.8139	2.4511	944.277	6797.53
